# Supplementary material for: Characterization of GvgD and GvgH encoded in the biosynthetic gene cluster of 4-formylaminooxyvinylglycine
Source: Royal Society of Chemistry journal article supplement (doi:10.1039/d3qo00007a), 2023-01-01
Supplement: d3qo00007a1.pdf [file d3qo00007a1.pdf]

**Characterization of GvgD and GvgH encoded in the biosynthetic gene cluster of 4-formylaminoxyvinylglycine**

Linlin Pang,<sup>a</sup> Weijing Niu,<sup>a</sup> Yuwei Duan,<sup>a</sup> Xiaoying Bian,<sup>a</sup> Youming Zhang<sup>a,c</sup> and Guannan Zhong<sup>\*a,b</sup>

a, Helmholtz International Laboratory for AntiInfectives, State Key Laboratory of Microbial Technology, Shandong University, Qingdao 266237, China.

b, Suzhou Research Institute of Shandong University, Suzhou 215123, China.

c, CAS Key Laboratory of Quantitative Engineering Biology, Shenzhen Institute of Synthetic Biology and Faculty of Synthetic Biology, Shenzhen Institute of Advanced Technology, Chinese Academy of Sciences, Shenzhen 518055, China.

\* To whom correspondence should be addressed. Email: zhonggn@sdu.edu.cn

## Supplementary Methods

### Materials and methods

**Materials, bacterial strains, and plasmids.** Biochemicals and media were purchased from Sinopharm Chemical Reagent Co. Ltd. (China) or Oxoid Ltd. (UK) unless stated otherwise. Enzymes were purchased from New England Biolabs Ltd. (UK) except *ApexHF* HS DNA polymerase for high-fidelity amplification from Accurate Biology Co. Ltd. (China). Chemical compounds and reagents were purchased from Bide Pharmatech Ltd. (China), Macklin Biochemical Technology Co., Ltd. (China) and J&K Scientific Ltd. (China) unless stated otherwise. Gene synthesis and codon optimization were performed at GENEWIZ, Inc (China). Primer synthesis and DNA sequencing were performed at Shanghai Sangon Biotech Co. Ltd. (China). Bacteria strains and plasmids used in this study are listed in Table S2. Primers used in this study are summarized in Table S3.

**Analysis.** High performance liquid chromatography (HPLC) analysis was carried out on Thermo Fisher Dionex UltiMate 3000 UHPLC system (Thermo Fisher Scientific Inc., USA). Electrospray ionization mass spectrometry (ESI-MS) was performed on Bruker AmaZon SL Ion Trap LC/MS spectrometer (Bruker Co. Ltd, Germany), and the data were analyzed using Bruker Daltonics DataAnalysis. ESI-high resolution MS (ESI-HR-MS) analysis was carried out on Bruker High Resolution Q-TOF mass spectrometry (impactHD) (Bruker Co. Ltd, Germany) and the data were analyzed using Bruker Daltonics DataAnalysis. NMR data were recorded on the Bruker Avance Neo 600 MHz NMR spectrometer (Bruker Co. Ltd, Germany).

**Sequence analysis.** Open reading frames (ORFs) were identified using the FramePlot 4.0beta program (<http://nocardia.nih.go.jp/fp4/>). The deduced proteins were compared with other known proteins in the databases using available BLAST methods (<http://blast.ncbi.nlm.nih.gov/Blast.cgi>). Amino acid sequence alignments were performed using the Strap program (<http://www.bioinformatics.org/strap/>). Homology modeling of the GvgD structure was conducted using the I-TASSER on-line server (<http://zhanglab.cmb.med.umich.edu/I-TASSER/>).

**Gene sequences of the codon optimized *gvgD*, *gvgH*, *metY<sub>WH6</sub>*, *metZ<sub>WH6</sub>***

*gvgD*:

```
ATGAGCCTGGTGGAAAGTGCATAACGAATGGGACCCGCTGGAAGAAATGATTGTGGGCGTGGCGCA
TGGCGCGCGCGTGGCCGCGCCGGATCGCGGCCTGTTTTCGCGCTGGATTATAGCGAACATCATGATA
GCCCGCATGAAATTCGAGCGGCCCGTATCCGGAACAGCTGATTGAAGAAGCGCAAGAAGATCTG
GATGCGTTTTCGCGCGTTTCTGGTGGGCCATGGCGTGACCGTGCGCCGCCCGCGCGAAACCTATCA
TGCGGCGCTGTTTGGCACCGCGGATTGGAAAACCGATGGCGAATATAACTATTGCCCGCGCGATG
TGCTGCTGCCGATTGGCAAAACCATTTATTGAAGCGCCGATGGCGCTGCGCAGCCGCTATTTTGAA
CCGTTTTCGCTATCGCGAACATCTGCAAGCGTATTTTTCGAGCGGCGCGAACTGGATTAGCGCGCC
GAAACCGGAACTGCCGGATAGCACCTATCGCGTGAACCCGCGCGAAGGCAGCATTATTGCGAACG
ATGAACCGATTTTTGATGCGGCGAACGTGCTGCGCATGGGCCGCGATATTCTGTATCTGGTGAGC
CGCAGCGGCAACCGCTGGGCTATGAATGGCTGAAACCGCTGCTGGGCGATCAGTATCGCGTGCA
TGCGCTGAGCGGCTTTTATGATGGCACCCATCTGGATAACCACCATACCCTGGTGCGCCCGGGCC
TGGTGGTGTGAACCCGGAACGCATTGGCAAAGATCAAGTGCCGGATGTGTTTTAAAACTGGGAT
ATTATTTGGGCGCCGATATGGTGGATACCGCTATTGCTGGAGCTATCCGCGCGCGAGCATTTG
GCAAGGCATGAACTTTATTATGGTGAACCCGAGCCTGGCGGTGATTAACGATCAGCAAGTGCCGC
TGATTCGCGCGCTGGAAAAACATCATGTGGATGTGGCGCCGCTGAAAATGCGCCATGCGCGCAGC
CTGAGCGGCGGCTTTCATTGCGTGAGCGTGGATATTGCGCGTTCGCGGCACCCTGGAAGATTGCCG
CTAA
```

*gvgH*:

```
ATGAGCAAAGTGATTTATAAAAAACCTGAACACGAGCCCGATTCTGGCGGTGGGCGGCGGGGCGT
GTGGCTGGAAGATGCGACCGGCAAACGCTATTTAGATACCTGCGGCGGCGTGGCGGTGAGCAGCC
TGGGCCATGGCCATCCGCGCATTCGCGCCGCGTTTTCGAACCGGAAGCGAAAAAATTAGCGTGGGCG
CATGCCGGCAGCTTACCACGGCGGCGCGGAGGAACTGGCGGAACGCCTGGTTGCCGCGAGTGG
TGGCCTGGCCCGCGCGCAGTTTCTGAGCGGCGGCGAGCGAAGTGATGGAACCTGGCGATGAAAATTG
CGTATCAGTATCAGTGCGAACGCGGCCCTGCCGAAAAAAGCCTGTTTATTAGCCGCCGTCAGAGC
TATCATGGCAGCACCCCTGGGCACCCTGAGCATTAGCGGCAACCCGAGCGTCAGAGCGTGTTTGG
TCAGCTGTTTTCGCGCCCGCGGAATTTGTGAGCCCGTGTCTATGCGTATCGCGATCAGCGCCCGGATG
AAAGCGAAGAACAGTATGCGACCCGCTGGCGGATGAACTGGATGCGAAAATTCGCGAGCCTGGGC
```

AGCGAAAACGTGGCGGCGTTTTTTGCGGAAACCGTGGTGGGCAGCACCAACGGCGCGGTGCCGGC  
GGTGCCGGGCTATTTTCGCAAAATTAAGCGGTGTGCGAACGCCATGATGTGCTGCTGATTCTGG  
ATGAAAGTATGGCGGGCATGGGCCGCACCGGCCAACTGTTTGCCTATGCCGATGATGGCATTGTG  
CCGGATATGGTGGCGGTGGGCAAAGCCTGGCGGCGGGCTATATGCCGATTAGCGCGCTGCTGAT  
TAGCGATCAAGTGCATAGCGTGATGGCGCGCGGCAGCGGCGTGCTGGGCAACGGTCAGACCCATG  
TGAACCATCCGCTGGCGTGCGCGATTGCGCTGGAAGTGCAGCAAGTGATTGAAGATGAAGATCTG  
CTGGCGCAAGTGCCTCAGCGCGGCGAACAGCTGCGCGCGTGCTGCGCGAAAGCCTGGCGGATCT  
GGATATTGTGGGCGATGTGCGCGGCCGCGGCCTGTTTGTGGGCGTGGAATTTGTGGAAAGCCGCG  
CGACCAAAGCGCCGTTTAAGGGCGGTGGCGCGTATGCGGCCGCGCTGAAACAAGAAGCGCTGCAG  
CGCGGCCCTGCTGATTTATCCGGGCAGCGGCACCGTGCAAGGCACCCATGGCAACCATGTGCTGTT  
TGCGCCGCCGTTTTATTACGAGCGAAGGCGAACTGGGTGAGATGGTGGAAACGCTTTAACGCGGTGG  
TGCGCGCGGTGGCGTATTAA

*metY<sub>WH6</sub>:*

ATGAAAGATGCGACCATTGCGCTGCATCATGGCTTTAAAAGCGATCCGACCACCAAAGCGGTGGC  
GGTGCCGATTTATCAGAACGTGGCGTTTGAATTTGATAACGCGCAGCATGGCGCGGATCTGTTTA  
ACCTGGATGTGCCGGGCAACATTTATACCCGATTATGAACCCGACCAACGATGTTTTAGAACAG  
CGTCTGGCGGCCCTGGAAGGCGGCATTGCCGGTCTGGCCGTGAGCGCGGGCAGCGCGGCATTCA  
TTATGCGATTCAGACCCTGACCCGCGCGGGCGATAACATTTGTGACCACCCCGCAGCTGTATGGCG  
GCACCTATACCCTGTTTGCGCATCTGCTGCCGAGCTTTGGCGTGGATGTGCGCTTTGCGCGCGAT  
GATAGCGCGGAAGCGATTGCGGAACTGATTGATGATAATAACAACTGGTGTATTGCGAAAGCAT  
TGGCAACCCGGCGGGCAACATTTGTGATCTGGAAGCGCTGGCAACGTGGCGCATGATCGCGGCG  
TGCCGCTGATGGTGGATAACACCGTGGCGACCCGATTCTGTGCAAACCGATTGAGTTTGGCGCG  
GATATTGTGGTGCATAGCGTGACCAAATATATTGGCGGCCATGGCAACAGCCTGGGCGGCGTGAT  
TGTGGATAGCGGCACCTTTCCGTGGGCGCAGTATCCGGAAAAATTTCCGGGCCTGAACACCCCGG  
AACCGCGTATCATGGCGTGGTGTATACCGAAAAATTTGGCCCGCGGCCTTTATTGCGCGTGCG  
CGTACCGTTCCGCTGCGCAATACCGGCGCGGCCCTGGCGCCGATGAACGCGTTTTCTGTTACTGCA  
AGGCCCTGGAACCCCTGGCGCTGCGCATGGAACGCCATAACCGAAAACGCGCTGAAAGTGGCGCAGT  
TTCTGCAAGGCCATAACCGCGGTGGAATGGGTGAGCTATGCGGGCCTGCCGGATCATCCGCATCAT  
GCGCTGGCGCAGAAATATCTGCAAGGCAAACCGAGCGCGATTCTGAGCTTTGGCCTGAAAGGCGG  
CTTTGATGCGGGCGTGCGCTTTTATGATGCGCTGCAGATTTTTAAACGCCTGGTGAACATTGGCG  
ATGCGAAAAGCCTGGCGTGCCATCCGGCGAGCACCCCATCGTCAGATGAACGAACAAGAACA  
GCGAAAAGCGGGCGTGAAACCGGAAATGATTGCGCTGAGCGTGGGCATTGAAGCGATTGAAGATCT  
GATTGACGACCTGCAACAAGCGCTGGGCAGCACCCGCCTGTAA

*metZ<sub>WH6</sub>:*

ATGAGCCAAGAATGGGATGCGGGCCGCCTGGATAGCGATCTGGATGGCGTGGCGTTTGATACCCT  
GGCGGTGCGCGCGGGTTCAGCATCGCACCCCGGAAGGCGAACATGGCGATCCGATGTTTTTTACGA  
GCAGCTATGTGTTTTGACACCGCGCGGATGCGGCCGCGCGCTTTGCGGGCGAAGTGCCGGGCAAC  
GTGTATAGCCGCTATACCAACCCGACCGTGCGCGCGTTTTGAAGAACGCATTGCGGCGCTGGAGGG  
TGCGGAACAAGCCGTGGCCACCGCGACCGCATGGCGGCGATTCTGGCGGTGGTGTGAGCCTGT  
GCAGCGCGGGCGATCATGTGCTGGTGTGAGCCGCGAGCGTGTGTTGGCAGCACCATTAGCCTGTTTAA  
AAATATTTTTAAACGCTTTGGCATTGAAGTGGATTATGTGCCGCTGGCGGATCTGAGCGGCTGGGA  
TACCGGATTTAAAGCGAACACCCGCCTGCTGTTTGTGGAAAGCCCGAGCAACCCGCTGGCGGAAC

TGGTGGATATTGCGGCCCTGAGCGAAGTGGCGCATGCGAAAAGGCGCGATGCTGGTGGTGGATAAC  
TGCTTTTGCACCCCGGCGCTGCAGCAGCCGCTGAAACTGGGCGCGGATATTGTGGTGCATAGCGC  
GACCAAAATTTATTGATGGCCAAGGCCGCTGCATGGGCGGCGTGGTGGCGGGCCGCAGCGAACAGA  
TGAAAGAAGTGGTGGGCTTTCTGCGCACCGCGGGCCCCGACCCTGAGCCCGTTTAAACGCGTGGATT  
TTTCTGAAAGGCCTGGAAACCCCTGGGCCTGCGCATGAAAGCGCATTGCGCGAACCGCGCAAGCGCT  
GGCGGAATGGCTGGAACAGCAAGATGGCATTGAAAAAGTGCATTATGCGGGCCTGAAAAGCCATC  
CGCAGCATGAACTGGCGCAGCGTCAGCAGCGCGGCTTTGGCGGGTGGTGGAGCTTTGAAGTGAAA  
GGCGGCAAAGAAGGCGCGTGGCGCTTTATTGATGCGACCCGCCTGATTAGCATTACCGCGAACCT  
GGGCGATAGCAAAACCACCATTACCCATCCGAGCACCACGAGCCATGGCCGCCTGGCGCCGCAAG  
AACCGAAGCGGCGGGCATTTCGCGATAGCCTGATTCGCGTGGCGGTGGGCCTGGAAGATGTGGCG  
GATCTGCAAGCGGATCTGGCGCGCGCCTGGCGGCGCTGTAA

### **Protein expression and purification**

**GvgD.** The plasmid pFG1001 (pET28a+gvgD) was electrotransformed into *Escherichia coli* BL21 (DE3) for protein expression. GvgD fused to an *N*-terminal 6 x His tag was expressed at 25 °C and shook at 200 rpm for 24 h with 100 µM isopropyl-β-D-thiogalactopyranoside (IPTG) added at OD<sub>600</sub>=0.6 for induction. Cells were harvested by centrifugation at 4 °C and re-suspended in lysis buffer containing 50 mM K<sub>2</sub>HPO<sub>4</sub> (pH 8.0), 300 mM NaCl, 5 mM imidazole and 10% (v/v) glycerol. After disruption by a low-temperature ultra-high-pressure cell disrupter, the insoluble material was removed by centrifugation at 20000 g at 4 °C. The soluble fraction was subjected to purification using a Ni Bestarose FF column (Bestchrom, China) according to the manufacturer's protocol. The elution fraction containing the recombinant protein was desalted using a PD-10 Desalting Column (GE Healthcare, USA) into storage buffer (50 mM K<sub>2</sub>HPO<sub>4</sub> (pH 8.0), 100 mM NaCl, 10% (v/v) glycerol and 1 mM 2-mercaptoethanol (2-ME)). The resulting protein was concentrated and stored at -80 °C. The purity of the protein was determined by 10% sodium dodecyl sulfate polyacrylamide gel electrophoresis (SDS-PAGE) analysis, and the concentration was determined by the Bradford assay using bovine serum albumin (BSA) as the standard.

**GvgH, MetY, MetZ.** The plasmids pFG1002 (pET28a+*gvgH*), pFG1003 (pET28a+*metY<sub>WH6</sub>*) and pFG1004 (pET28a+ *metZ<sub>WH6</sub>*) were transferred into *E. coli* BL21 (DE3) for expression, respectively. The proteins were purified to homogeneity, and concentrated according to the procedures described above for GvgD. Storage buffer free of 2-mercaptoethanol (50 mM K<sub>2</sub>HPO<sub>4</sub> (pH 8.0), 100 mM NaCl, 10% (v/v) glycerol) was utilized instead of the 2-mercaptoethanol containing buffer for GvgD.

**Site-directed mutations of GvgD C332A, C332S, H227A, D179A, D108A, D229A and GvgH K268R.** Plasmids containing site-directed mutations were generated using the primers listed in Table S2 for PCR amplification with pFG1001 or pFG1002 as the template. Then, 1  $\mu$ L of *DpnI* enzyme was added to the PCR system to remove the template. The PCR system was desalted by 0.025  $\mu$ m mixed cellulose ester (MCE) membrane (Merck Millipore Ltd., USA) and electrotransformed into *E. coli* BL21 (DE3). After sequencing to validate the fidelity, the resulting mutant proteins were expressed in *E. coli* BL21 (DE3), purified to homogeneity, and concentrated according to the procedures described above for the native proteins.

**Site-directed mutation of GvgH K268A.** Two DNA fragments containing K268A mutant (fragment 1) and the antibiotic resistance marker *kan* (fragment 2) were generated using the primers listed in Table S2 for PCR amplification with pFG1002 as the template, respectively. After purification by agarose gel electrophoresis, 600 ng fragment 1 and 400 ng fragment 2 were assembled in a 20  $\mu$ L system including 10  $\mu$ L 2 $\times$  MultiF Samless Assembly Mix (ABclonal Technology Co.,Ltd., USA) at 50  $^{\circ}$ C for 2 h. The assembled system was desalted by

MCE membrane and electrotransformed into *E. coli* BL21 (DE3). After sequencing to validate the fidelity, the resulting mutant protein was expressed in *E. coli* BL21 (DE3), purified to homogeneity, and concentrated according to the procedures described above for the native proteins.

***In vitro* enzymatic assay for GvgD.** The assays for GvgD (total volume, 100  $\mu$ L) were performed at 30 °C for 3 h in 50 mM Tris-HCl buffer (pH 7.5) containing 1 mM L-canaline (or L-ornithine, L-lysine, L-Dab), 1 mM L-arginine (or L-canavanine, L-homoarginine) in the presence of 40  $\mu$ M GvgD or GvgD mutants. The assays were quenched by adding an equal volume (100  $\mu$ L) of CH<sub>3</sub>CN. After centrifugation, 4  $\mu$ L of dansyl chloride (DNSC, 50 mM in CH<sub>3</sub>CN) was added to the 200  $\mu$ L of supernatant of the assays, followed by further incubation at 50 °C for 1 h to derivatize the amino group. After removal of precipitate by centrifugation, the mixtures were then subjected to HPLC-ESI-(HR)MS analysis on an Acclaim TM RSLC 120 C18 column (2.1  $\times$  100 mm, 2.2  $\mu$ m, 120 Å, Thermo Fisher Scientific Inc., USA) by gradient elution of solvent A (H<sub>2</sub>O containing 0.1% formic acid) and solvent B (CH<sub>3</sub>CN containing 0.1% formic acid) with a flow rate of 0.3 mL/min over a 25 min period as follows: T = 0 min, 5% B; T = 3 min, 5% B; T = 18 min, 95% B; T = 22 min, 95% B; T = 23 min, 5 % B; and T = 25 min, 5% B (mAU at 254 nm).

**Kinetic studies for GvgD.** To determine the apparent kinetic parameters of the forward (L-Arg + L-canaline) and reverse (L-canavanine + L-ornithine) reactions, the assays contained 50 mM Tris-HCl buffer (pH 7.5), 40  $\mu$ M GvgD, and various concentrations of reactants (L-Arg + L-canaline, 0.5 mM to 2.5 mM, or L-canavanine + L-ornithine, 0.7 mM to 2.5 mM) in a final volume of 300  $\mu$ L. To determine the apparent kinetic constants for L-Arg + L-Lys, the same reaction system was

constructed with L-Arg + L-Lys various from 0.7 mM to 2.5 mM. All reactions were performed at 30 °C, and terminated by addition of an equal volume of CH<sub>3</sub>CN. After centrifugation and DNSC derivatization, the mixtures were then analyzed by HPLC-ESI-MS.

***In vitro* enzymatic assay for GvgH (MetY<sub>WH6</sub> or MetZ<sub>WH6</sub>).** The assays for GvgH (MetY<sub>WH6</sub> or MetZ<sub>WH6</sub>, total volume, 100 μL) were performed at 30 °C for 3 h in 100 mM K<sub>2</sub>HPO<sub>4</sub> buffer (pH 7.5) containing 1 mM *O*-succinylhomoserine (or *O*-acetylhomoserine, 2-aminobut-3-enoic acid), 1 mM pyridoxal 5'-phosphate monohydrate (PLP), (and 1 mM 2-mercaptoethanol) in the presence of 50 μM GvgH (or MetY<sub>WH6</sub>, MetZ<sub>WH6</sub>). The assays were quenched by adding 90 μL of CH<sub>3</sub>CN. After centrifugation, 4 μL of DNSC (50 mM in CH<sub>3</sub>CN) and 10 μL of Li<sub>2</sub>CO<sub>3</sub> (800 mM suspension in CH<sub>3</sub>CN) were added to the supernatant of the assays, followed by further incubation at room temperature for 1 h to derivatize the amino group. The mixtures were then subjected to HPLC-ESI-(HR)MS analysis according to the procedure described above for GvgD.

**Derivatization of the commercially available amino acids as standards.** Commercially available amino acids were dissolved in Tris-HCl buffer (50 mM, pH 7.5) or K<sub>2</sub>HPO<sub>4</sub> buffer (100 mM, pH 7.5) to obtain 1 mM aqueous solutions. Then 100 μL of the aqueous solutions were mixed with an equal volume of CH<sub>3</sub>CN, 4 μL of DNSC (50 mM in CH<sub>3</sub>CN) was added to each of the 200 μL amino acid aqueous solution, following by further incubation at 50 °C for 1 h to derivatize the amino group. After removal of precipitate by centrifugation, the mixtures were then subjected to HPLC-ESI-(HR)MS analysis according to the procedure described above for GvgD.



**Table S1.** Apparent kinetic parameters of GvgD on different substrates. All experiments were repeated three times.

| Substrate                  | Apparent<br>$K_m$<br>(mM) | Apparent<br>$V_{max}$<br>(mM s <sup>-1</sup> ) | Apparent<br>$K_{cat}$<br>(s <sup>-1</sup> ) | Apparent<br>$K_{cat}/K_m$<br>(mM <sup>-1</sup> s <sup>-1</sup> ) |
|----------------------------|---------------------------|------------------------------------------------|---------------------------------------------|------------------------------------------------------------------|
| L-cnalanine + L-arginine   | 4.59                      | 0.0962                                         | 2.41                                        | 0.524                                                            |
| L-ornithine + L-canavanine | 6.13                      | 0.220                                          | 5.51                                        | 0.899                                                            |
| L-lysine + L-arginine      | 13.67                     | 0.00399                                        | 0.0998                                      | 0.00730                                                          |

**Table S2.** Bacterial strains and plasmids.

| Strain/Plasmid  | Characteristic(s)                                                                                       | Source/<br>Reference |
|-----------------|---------------------------------------------------------------------------------------------------------|----------------------|
| <i>E. coli</i>  |                                                                                                         |                      |
| BL21 (DE3)      | Host for protein expression                                                                             | NEB                  |
| FG1001          | BL21 (ED3) derivative, containing pFG1001 for producing GvgD                                            | This study           |
| FG1002          | BL21 (ED3) derivative, containing pFG1002 for producing GvgH                                            | This study           |
| FG1003          | BL21 (ED3) derivative, containing pFG1003 for producing MetY <sub>WH6</sub>                             | This study           |
| FG1004          | BL21 (ED3) derivative, containing pFG1004 for producing MetZ <sub>WH6</sub>                             | This study           |
| FG1005          | FG1001 derivative, containing pFG1005                                                                   | This study           |
| FG1006          | FG1001 derivative, containing pFG1006                                                                   | This study           |
| FG1007          | FG1001 derivative, containing pFG1007                                                                   | This study           |
| FG1008          | FG1001 derivative, containing pFG1008                                                                   | This study           |
| FG1009          | FG1001 derivative, containing pFG1009                                                                   | This study           |
| FG1010          | FG1001 derivative, containing pFG1010                                                                   | This study           |
| FG1011          | FG1002 derivative, containing pFG1011                                                                   | This study           |
| FG1012          | FG1002 derivative, containing pFG1012                                                                   | This study           |
| <b>Plasmids</b> |                                                                                                         |                      |
| pET-28a(+)      | Protein expression vector used in <i>E. coli</i> , encoding N-terminal 6× His-tag, kanamycin resistance | Novagen              |
| pFG1001         | pET28a(+) derivative containing <i>gvgD</i> (NdeI+XhoI)                                                 | This study           |
| pFG1002         | pET28a(+) derivative containing <i>gvgH</i> (NdeI+XhoI)                                                 | This study           |
| pFG1003         | pET28a(+) derivative containing <i>metY<sub>WH6</sub></i> (NdeI+HindIII)                                | This study           |
| pFG1004         | pET28a(+) derivative containing <i>metZ<sub>WH6</sub></i> (NdeI+HindIII)                                | This study           |
| pFG1005         | pET28a(+) derivative containing <i>gvgD</i> D108A                                                       | This study           |
| pFG1006         | pET28a(+) derivative containing <i>gvgD</i> D179A                                                       | This study           |
| pFG1007         | pET28a(+) derivative containing <i>gvgD</i> D229A                                                       | This study           |
| pFG1008         | pET28a(+) derivative containing <i>gvgD</i> H227A                                                       | This study           |
| pFG1009         | pET28a(+) derivative containing <i>gvgD</i> C332A                                                       | This study           |
| pFG1010         | pET28a(+) derivative containing <i>gvgD</i> C332S                                                       | This study           |
| pFG1011         | pET28a(+) derivative containing <i>gvgH</i> K268R                                                       | This study           |
| pFG1012         | pET28a(+) derivative containing <i>gvgH</i> K268A                                                       | This study           |

**Table S3.** Primers used in this study.

| Primer           | Sequence (5'-3')                                                  |
|------------------|-------------------------------------------------------------------|
| GvgD D108A-for   | AACTATTGCCCGCGC <b>GCA</b> GTGCTGCTGCCGATT                        |
| GvgD D108A-rev   | AATCGGCAGCAGCAC <b>TGC</b> GCGCGGGCAATAGTT                        |
| GvgD D179A-for   | GATGAACCGATTTTT <b>GCA</b> GCGGCGAACGTGCTG                        |
| GvgD D179A-rev   | CAGCACGTTCCGCCGC <b>TGC</b> AAAAATCGGTTTCATC                      |
| GvgD D229A-for   | GATGGCACCCATCTG <b>GCA</b> ACCACCATTACCCTG                        |
| GvgD D229A-rev   | CAGGGTAATGGTGGT <b>TGC</b> CAGATGGGTGCCATC                        |
| GvgD H227A-for   | TTTTATGATGGCACC <b>GCA</b> CTGGATAACCACCATT                       |
| GvgD H227A-rev   | AATGGTGGTATCCAG <b>TGC</b> GGTGCCATCATAAAA                        |
| GvgD C332A-for   | AGCGGCGGCTTTCAT <b>GCA</b> GTGAGCGTGGATATT                        |
| GvgD C332A-rev   | AATATCCACGCTCAC <b>TGC</b> ATGAAAGCCGCCGCT                        |
| GvgD C332S-for   | AGCGGCGGCTTTCAT <b>AGC</b> GTGAGCGTGGATATT                        |
| GvgD C332S-rev   | AATATCCACGCTCAC <b>GCT</b> ATGAAAGCCGCCGCT                        |
| GvgH K268R-for   | ATGGTGGCGGTGGGC <b>CGT</b> GGCCTGGCGGCGGGC                        |
| GvgH K268R-rev   | GCCCGCCGCCAGGCC <b>ACG</b> GCCACCGCCACCAT                         |
| GvgH K268A-1-for | CCTTTGCCATGTTTCAGAAACAACCTCTGGCGCATCGGGCTTCCCATACAA               |
| GvgH K268A-1-rev | GCTAATCGGCATATAGCCCGCCGCCAGGCC <b>TGC</b> GCCACCGCCACCATAT<br>CCG |
| GvgH K268A-2-for | GGCCTGGCGGCGGGCTATAT                                              |
| GvgH K268A-2-rev | GCCAGAGTTGTTTCTGAAAC                                              |

**Figure S1.** Proposed inhibitive mechanism of oxyvinylglycine for the eliminase subgroup of PLP-dependent enzymes.<sup>1</sup>

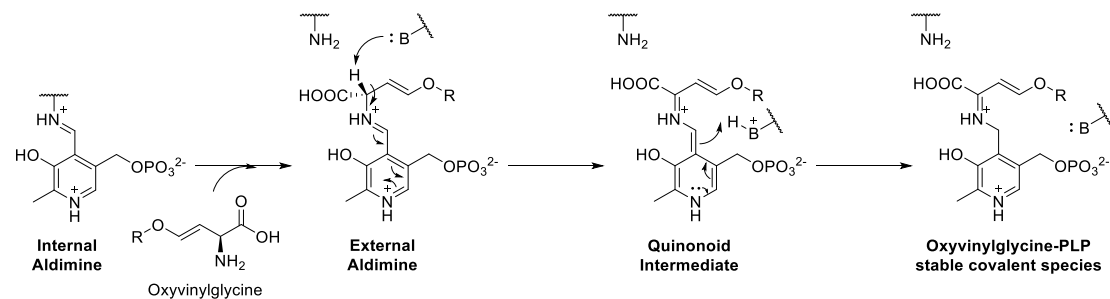

**Figure S2.** Distinct biosynthetic pathways of AMB (A), rhizobitoxine (B) and D-cycloserine (C).<sup>2-</sup>

11

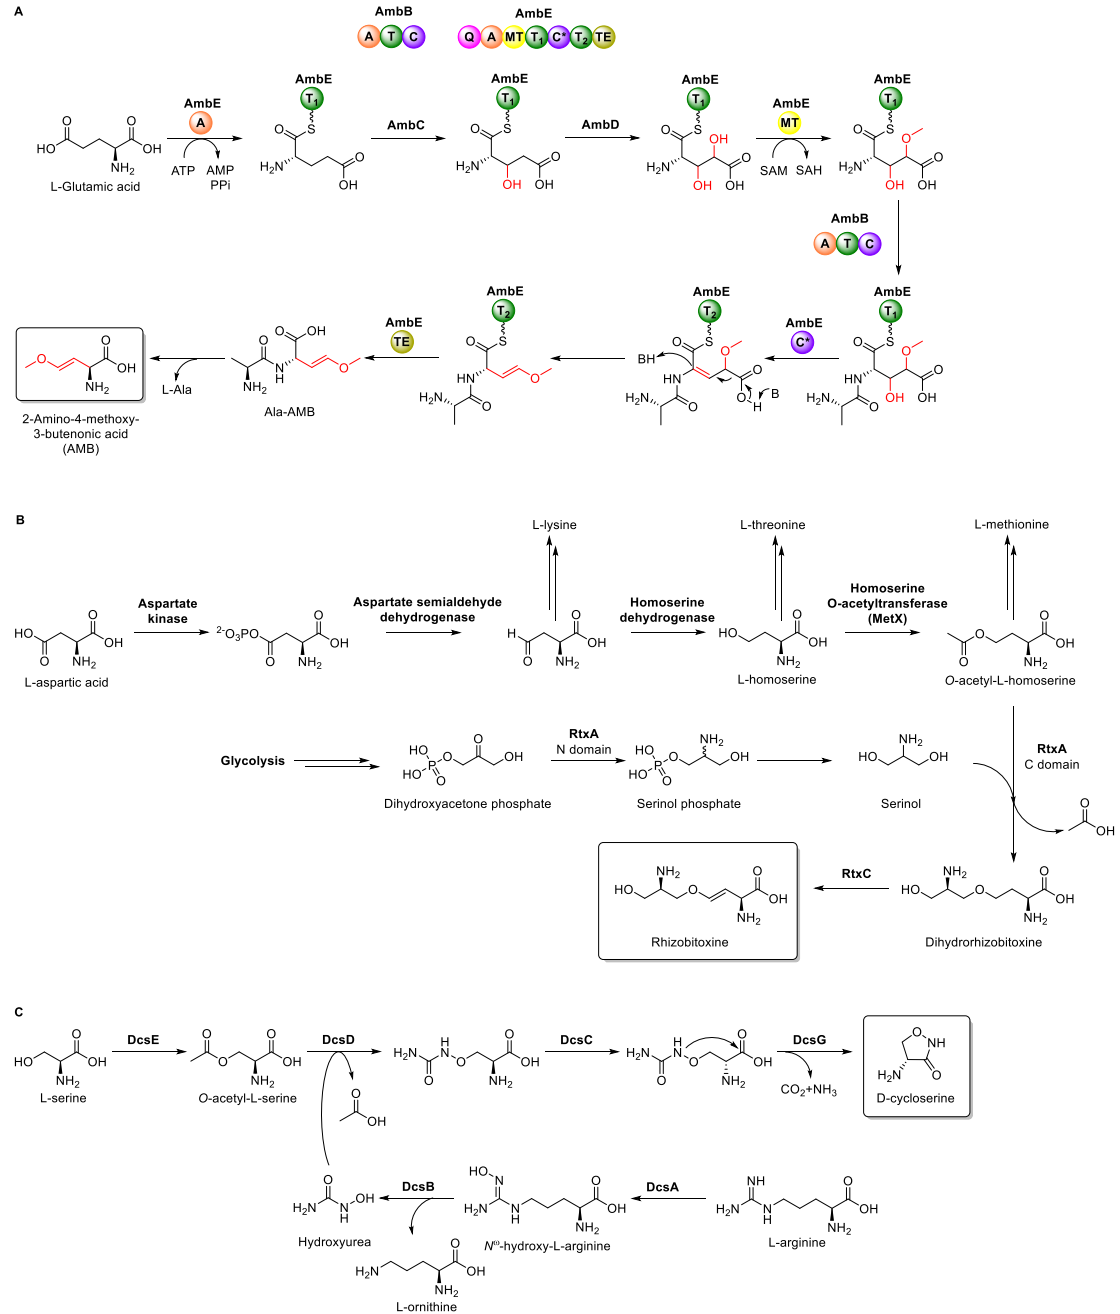

**Figure S3.** The biosynthetic gene cluster of FVG in *P. fluorescens* WH6 with predicted functions. *gvgD* and *gvgH* are highlighted in red and blue, respectively.<sup>12-14</sup>

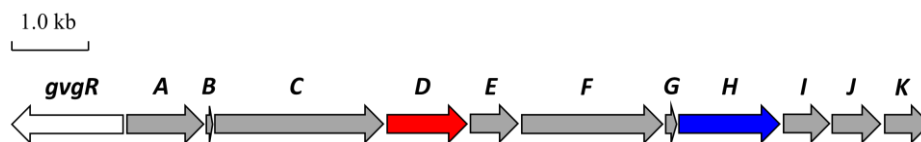

| Gene        | Length (aa) | Predicted function                          |
|-------------|-------------|---------------------------------------------|
| <i>gvgR</i> | 484         | GntR family transcriptional regulator       |
| <i>gvgA</i> | 335         | SGNH/GDSL hydrolase family protein          |
| <i>gvgB</i> | 27          | Hypothetical protein                        |
| <i>gvgC</i> | 736         | Iron-containing redox enzyme family protein |
| <i>gvgD</i> | 347         | Amidinotransferase                          |
| <i>gvgE</i> | 207         | LysE family transporter                     |
| <i>gvgF</i> | 613         | Carbamoyltransferase                        |
| <i>gvgG</i> | 47          | Hypothetical protein                        |
| <i>gvgH</i> | 439         | PLP-dependent aminotransferase              |
| <i>gvgI</i> | 202         | Formyltransferase                           |
| <i>gvgJ</i> | 203         | LysE family transporter                     |
| <i>gvgK</i> | 228         | LysE family transporter                     |

**Figure S4.** Denaturing SDS-PAGE analysis (conc. 10%) of GvgD and its mutants. Lane 1, Protein standard; Lane 2, GvgD (41.61 kDa); Lane 3, Protein standard; Lane 4, GvgD C332A; Lane 5, Protein standard; Lane 6, GvgD C332S; Lane 7, Protein standard; Lane 8, GvgD H227A; Lane 9, Protein standard; Lane 10, GvgD D179A; Lane 11, Protein standard; Lane 12, GvgD D108A.

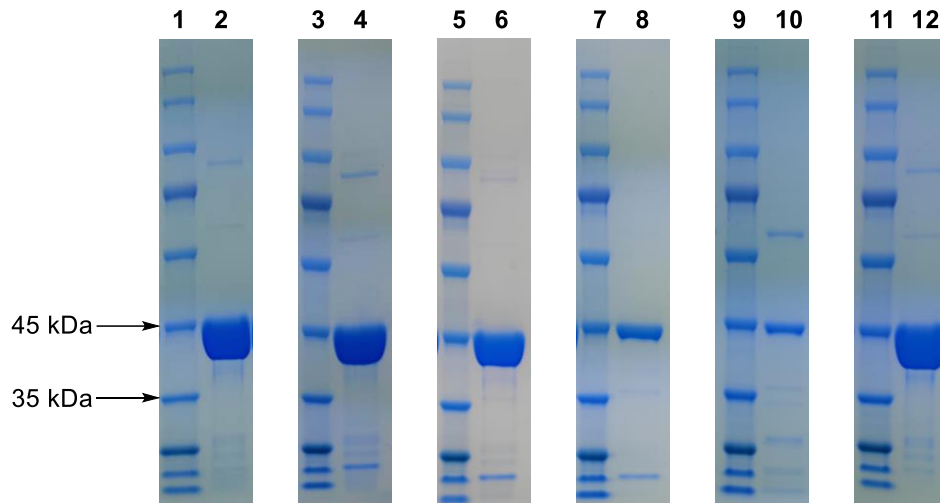

**Figure S5.** HPLC-ESI-HRMS of DNS-3, DNS-Orn, DNS-Arg and DNS-2, respectively.

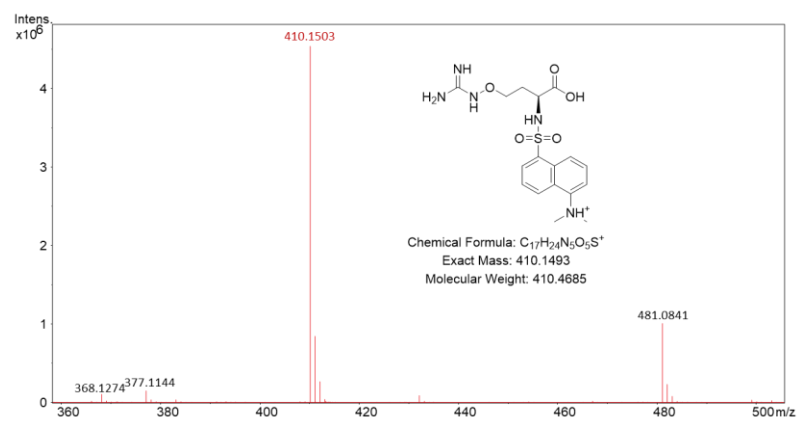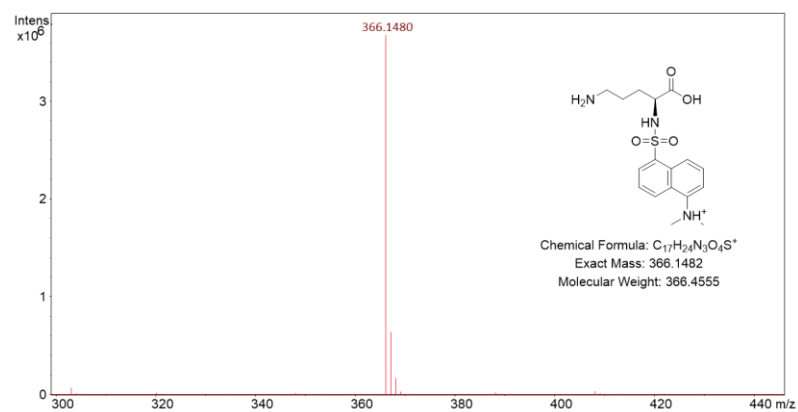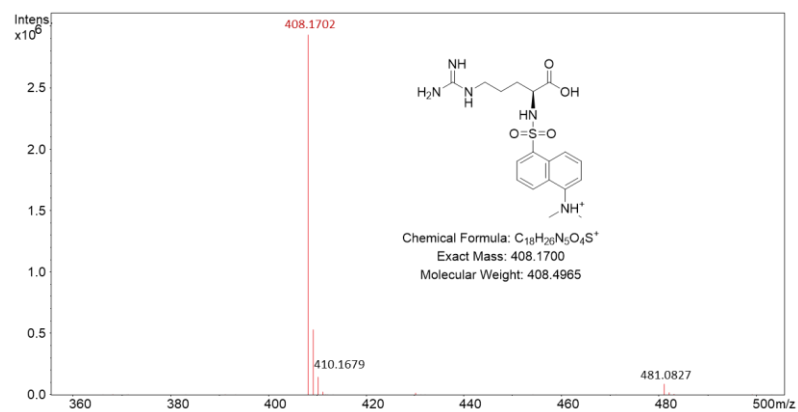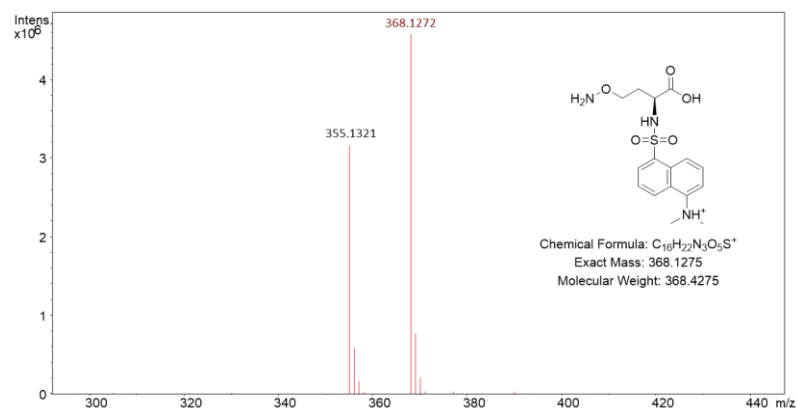



**Figure S6.** *In vitro* characterization of GvgD with L-Lys (A) or L-Dab (B) as amidino acceptors.

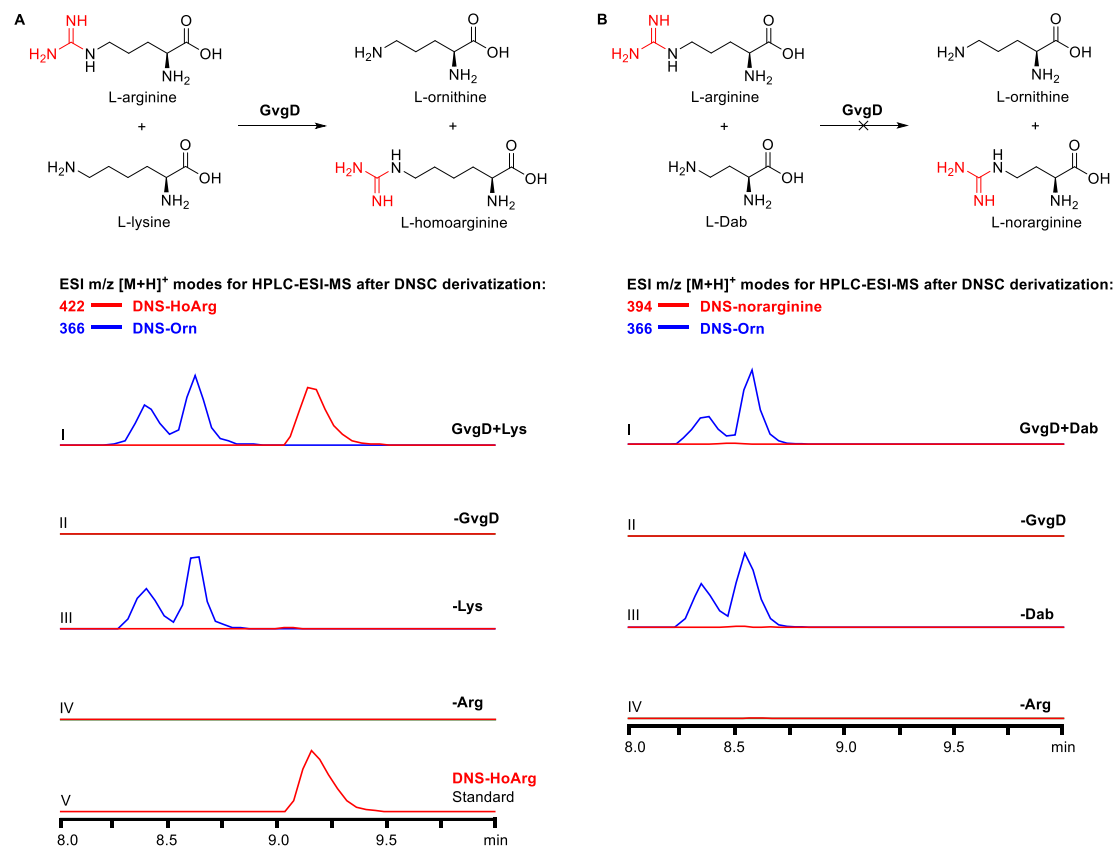

**Figure S7.** *In vitro* characterization of GvgD with L-HoArg as amidino donor and L-canaline (A) or L-Orn (B) as amidino acceptors.

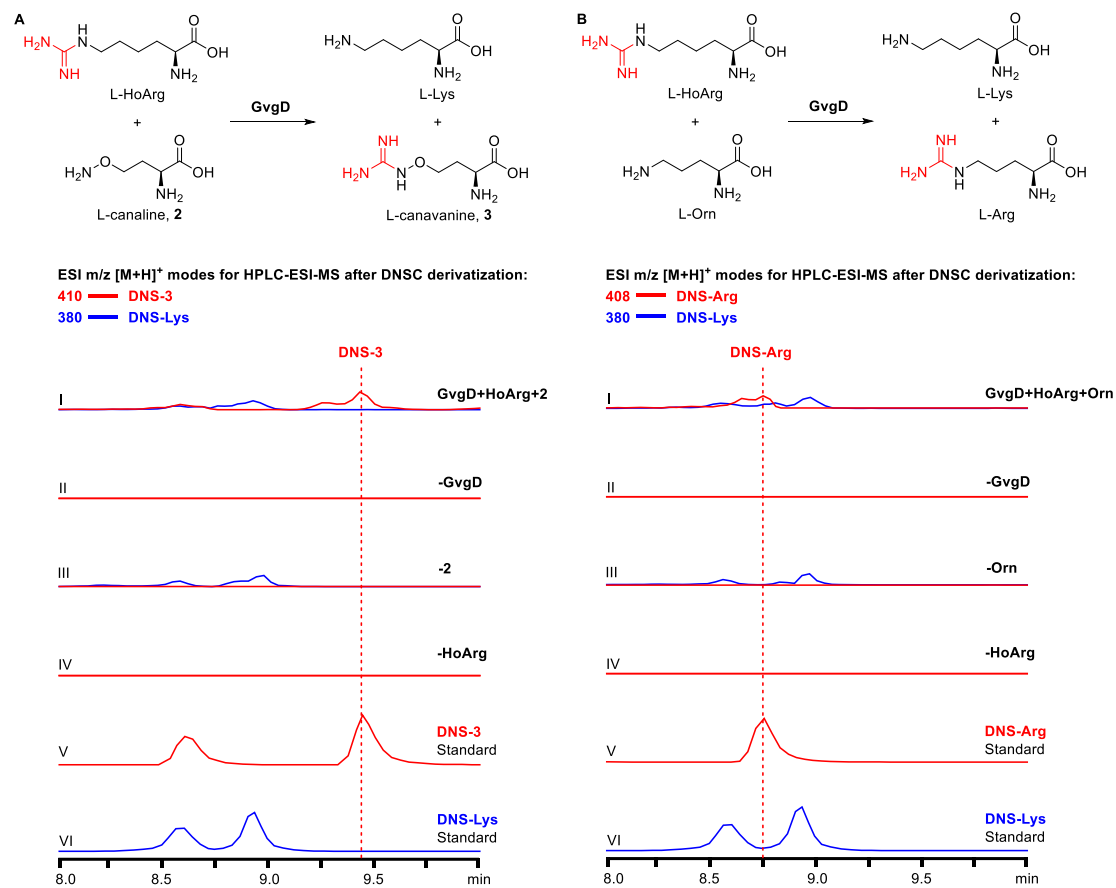

**Figure S8.** Homology modeling of GvgD performed by I-TASSER. **(A)** The alignment of GvgD (Green) and StxG (Cyan, Protein DataBank entry 6U1R<sup>15</sup>). **(B)** Partial enlarged detail of GvgD (Green) and StxG (Cyan) at the catalytic sites. The related residues (indicated in sticks) of the two proteins are close in space.

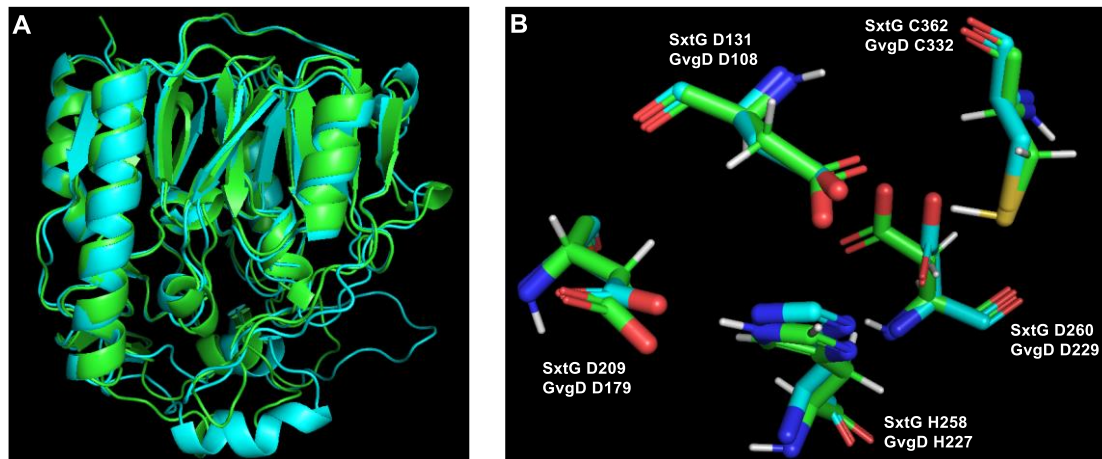

**Figure S9.** Partial sequence alignment of GvgD and the homologous proteins. The proposed catalytic sites are indicated by red triangles.

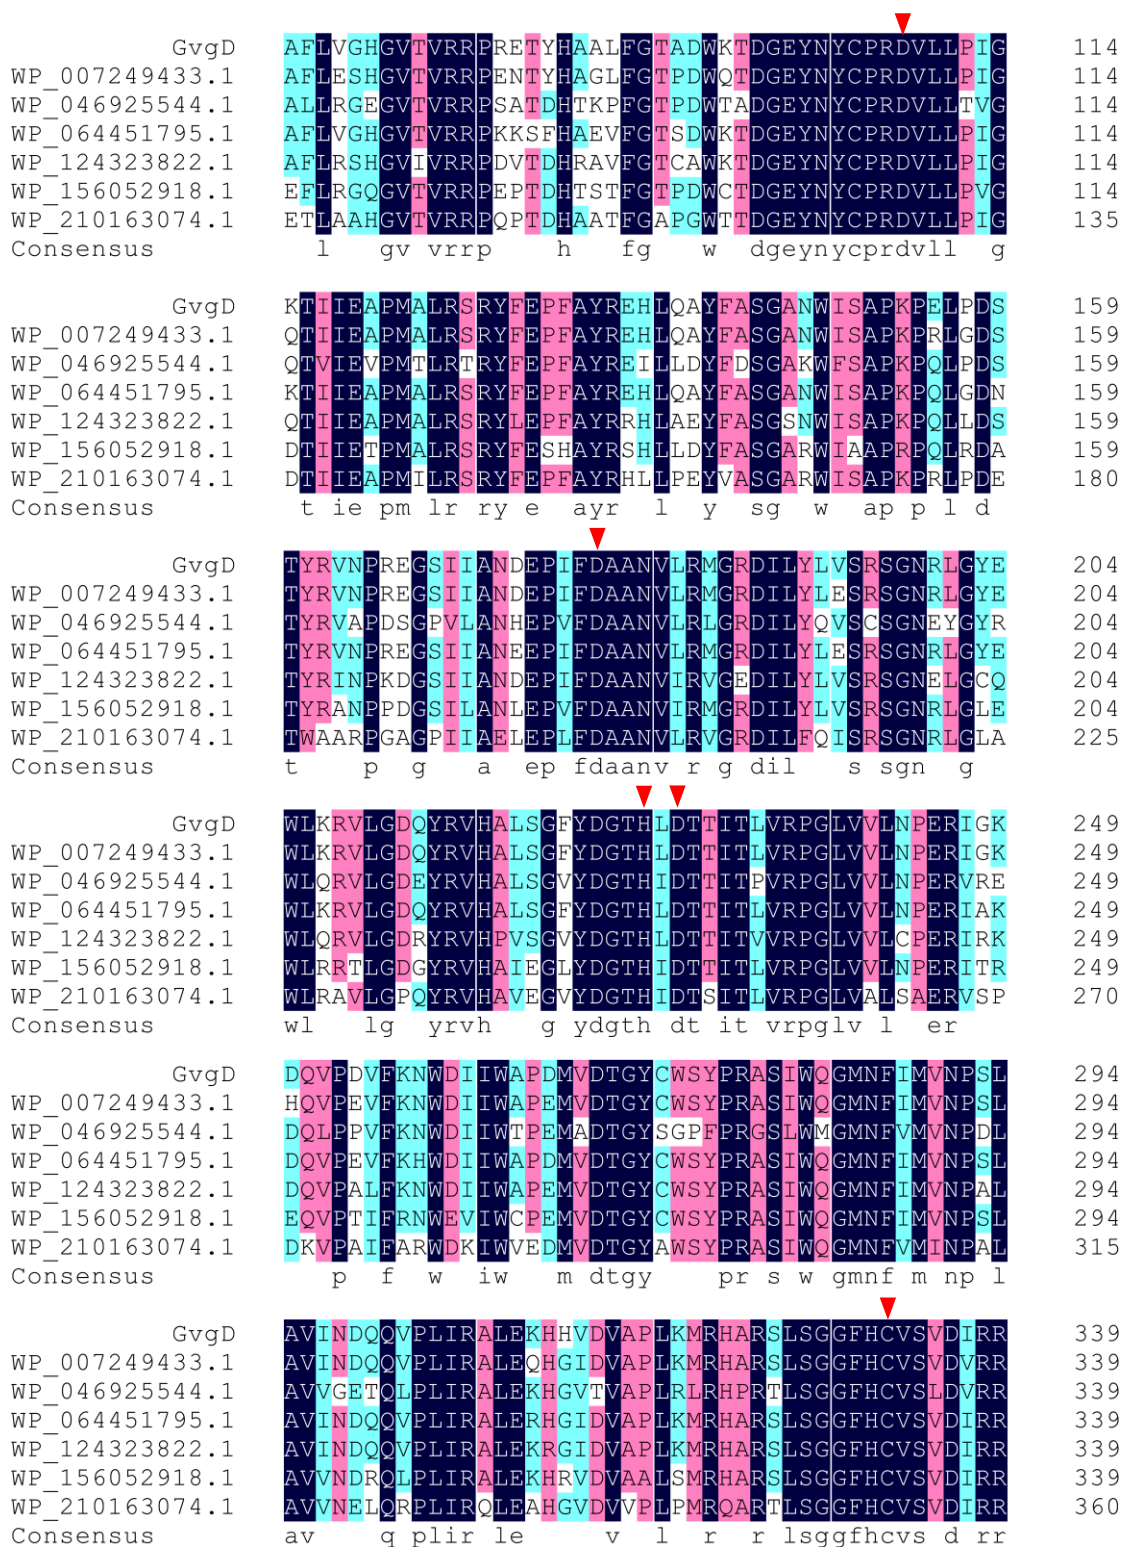

**Figure S10.** Evaluation of the putative catalytic sites (**A**) and the proposed catalytic mechanism of GvgD (**B**). The peaks with  $[M+H]^+=410$  in **II-VII** are isotopic peaks of DNS-Arg ( $[M+H]^+=408$ ) and are extraneous to DNS-3.

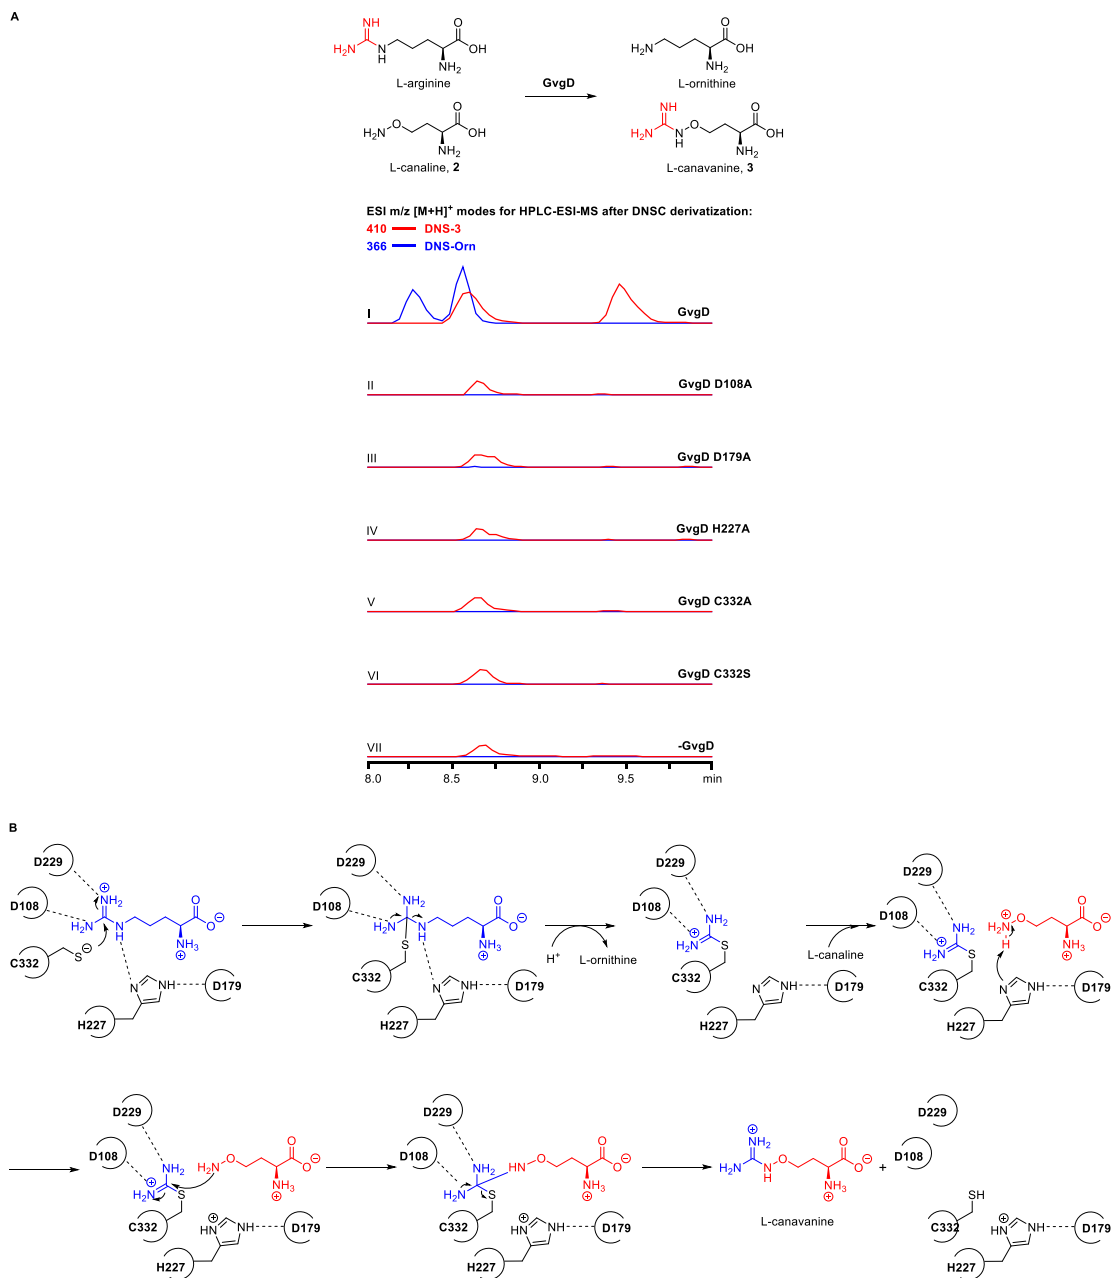

**Figure S11.** Denaturing SDS-PAGE analysis (conc. 10%) of GvgH, GvgH mutants, MetY<sub>WH6</sub> and MetZ<sub>WH6</sub>. Lane 1, Protein standard; Lane 2, GvgH (49.04 kDa); Lane 3, Protein standard; Lane 4, GvgH K268A; Lane 5, Protein standard; Lane 6, GvgH K268R; Lane 7, Protein standard; Lane 8, MetY<sub>WH6</sub> (47.86 kDa); Lane 9, Protein standard; Lane 10, MetZ<sub>WH6</sub> (45.41 kDa).

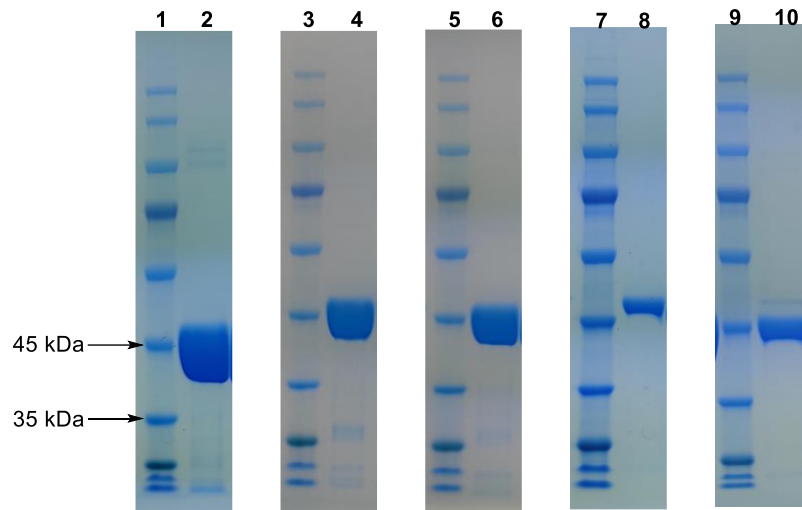

**Figure S12.** Visible spectra of GvgH, MetY<sub>WH6</sub>, MetZ<sub>WH6</sub>, and GvgH mutants.

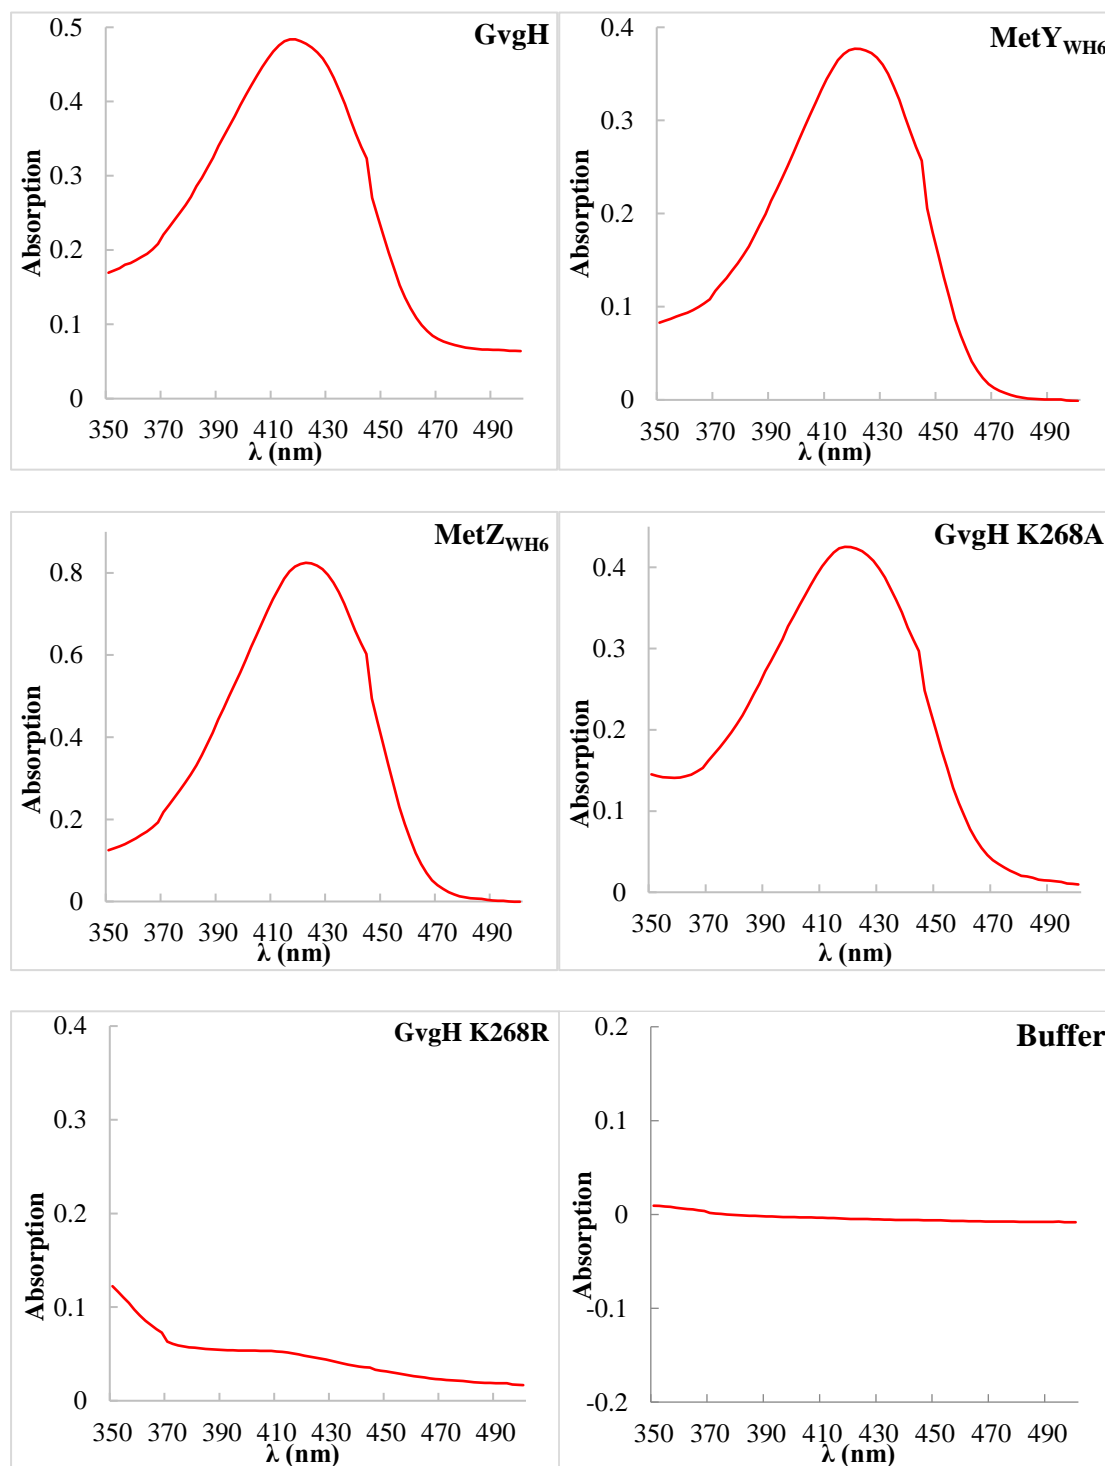

**Figure S13.** HPLC-ESI-HRMS of DNS-6, DNS-7 and MS/MS fragmentation analysis of DNS-7, respectively.

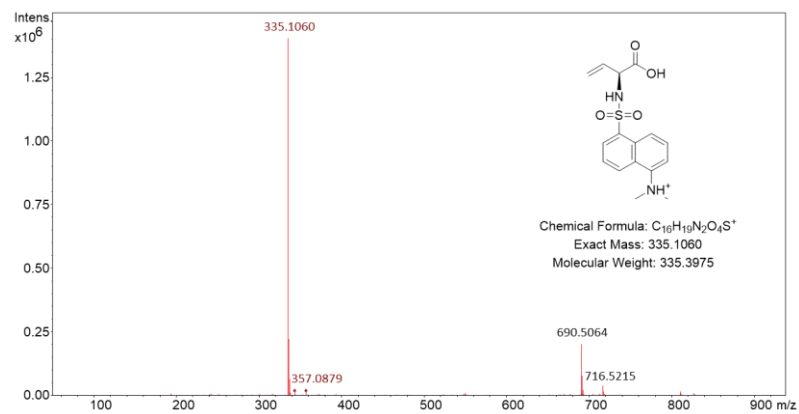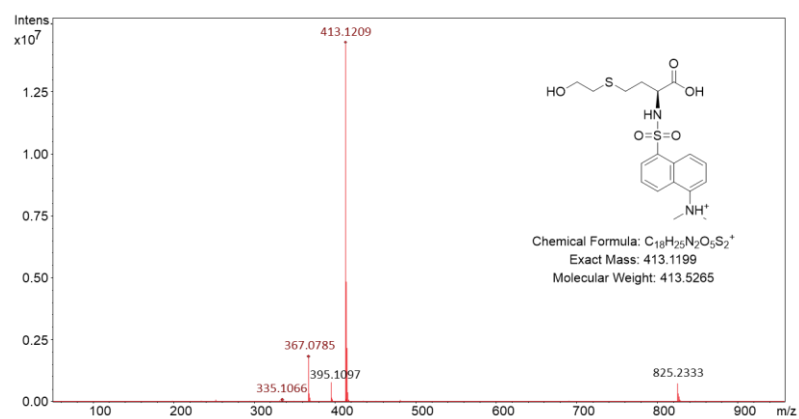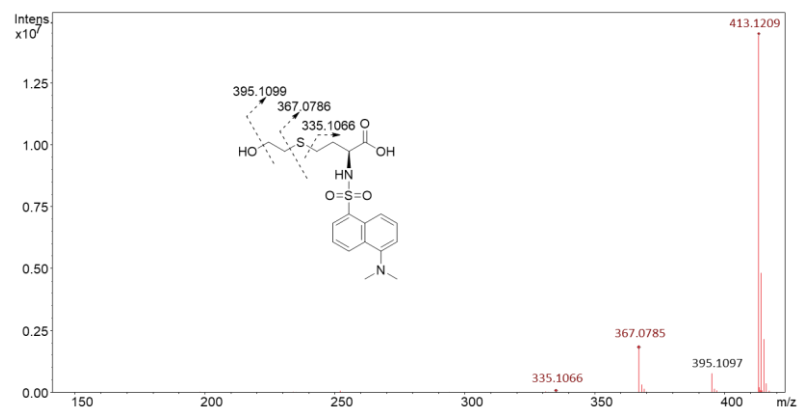



**Figure S14.** Characterization of the  $\gamma$ -elimination activity of GvgH with L-homoserine (HoSer) and L-homocysteine (HoCys).

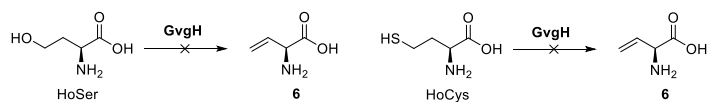

ESI m/z [M+H]<sup>+</sup> modes for HPLC-ESI-MS after DNSC derivatization:

353 — HoSer

369 — HoCys

335 — DNS-6

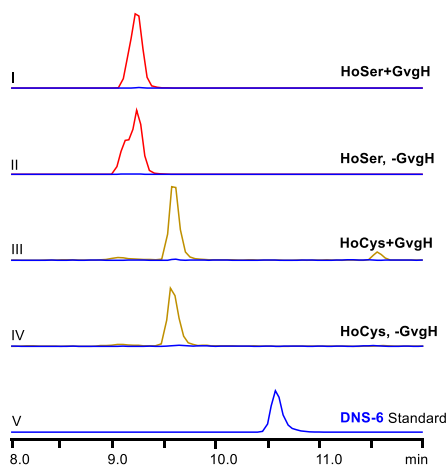

**Figure S15.** NMR and HPLC-ESI-HRMS spectra of chemically synthesized **7**.

**A:**  $^1\text{H-NMR}$  spectrum (600 MHz,  $\text{D}_2\text{O}$ ).

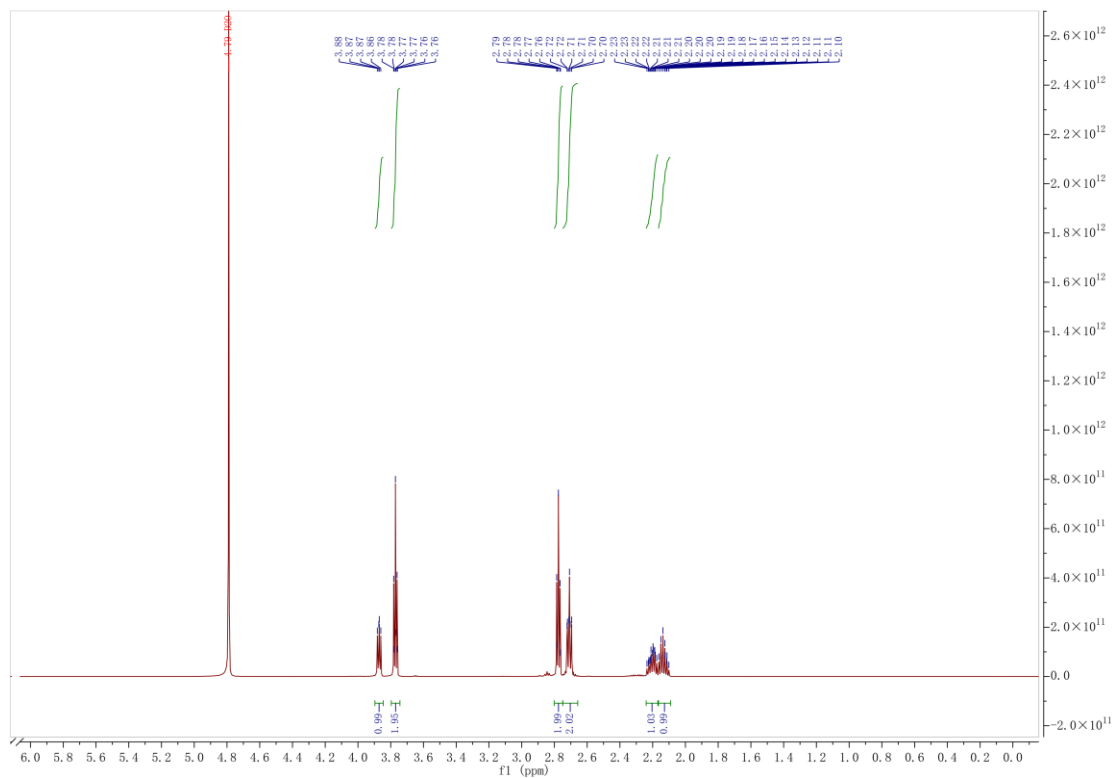

**B:**  $^{13}\text{C-NMR}$  spectrum (150 MHz,  $\text{D}_2\text{O}$ )

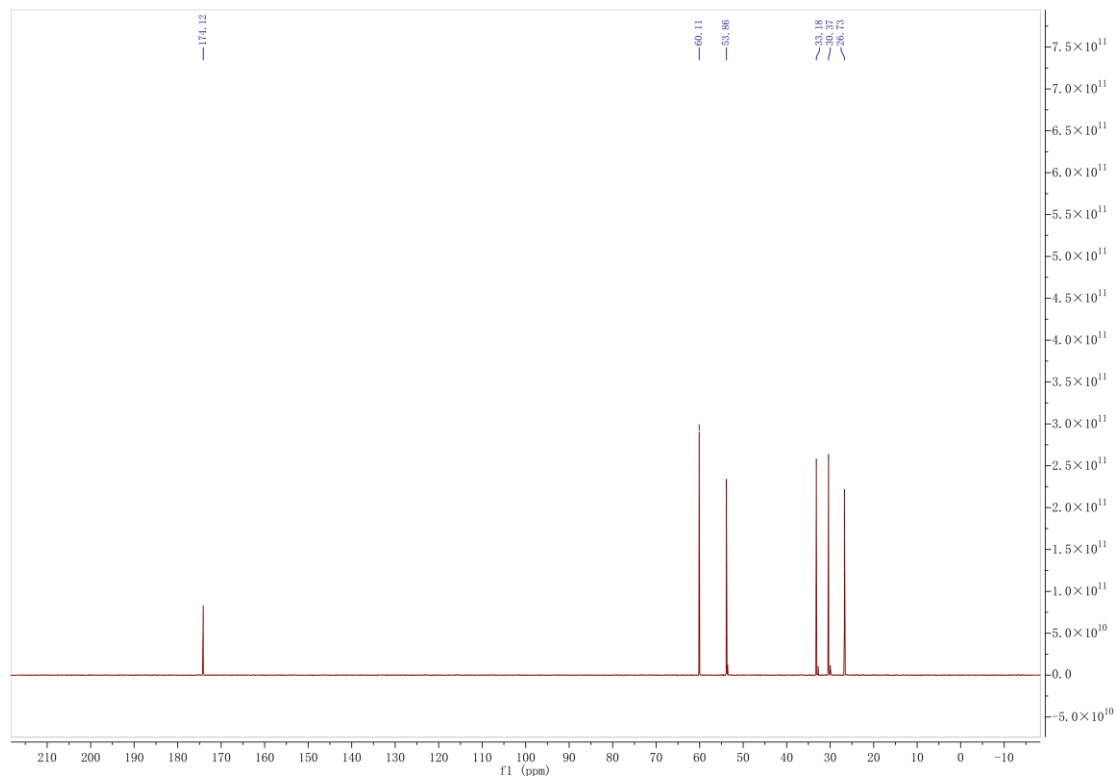

C: HPLC-ESI-HRMS,  $[C_6H_{14}NO_3S]^+$ , calcd. 180.0689, found 180.0684.

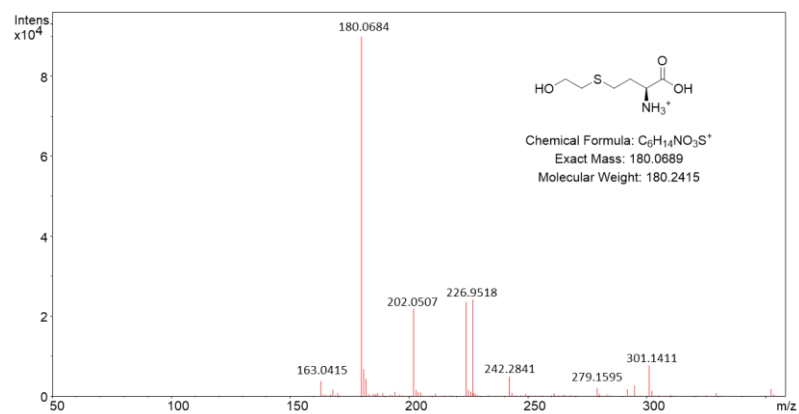

**Figure S16.** Characterization of the addition activity of GvgH, MetY<sub>WH6</sub> and MetZ<sub>WH6</sub> with exogenous **6** and 2-ME.

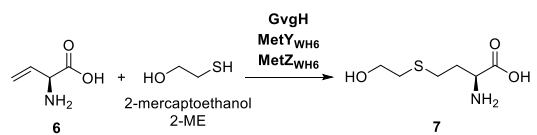

ESI m/z [M+H]<sup>+</sup> modes for HPLC-ESI-MS after DNSC derivatization:

335 — DNS-6

413 — DNS-7

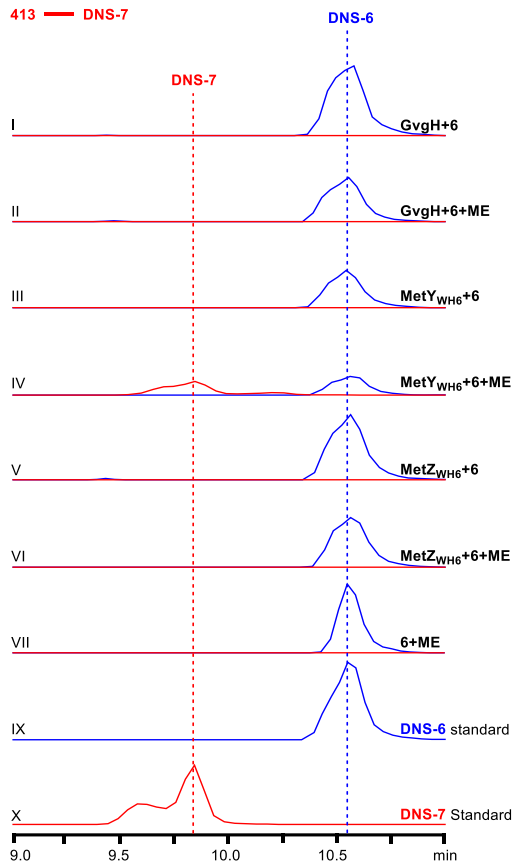

**Figure S17.** Characterization of the addition activity of GvgH with (A) hydroxylamine (8), (B) hydroxyurea (9) or (C) hydroxyguanidine (10). The peak of  $[M+H]^+=410$  in figure C is extraneous to DNS-3 as this peak was also observed in negative controls omitting GvgH and the retention time was distinct from DNS-3 standard.

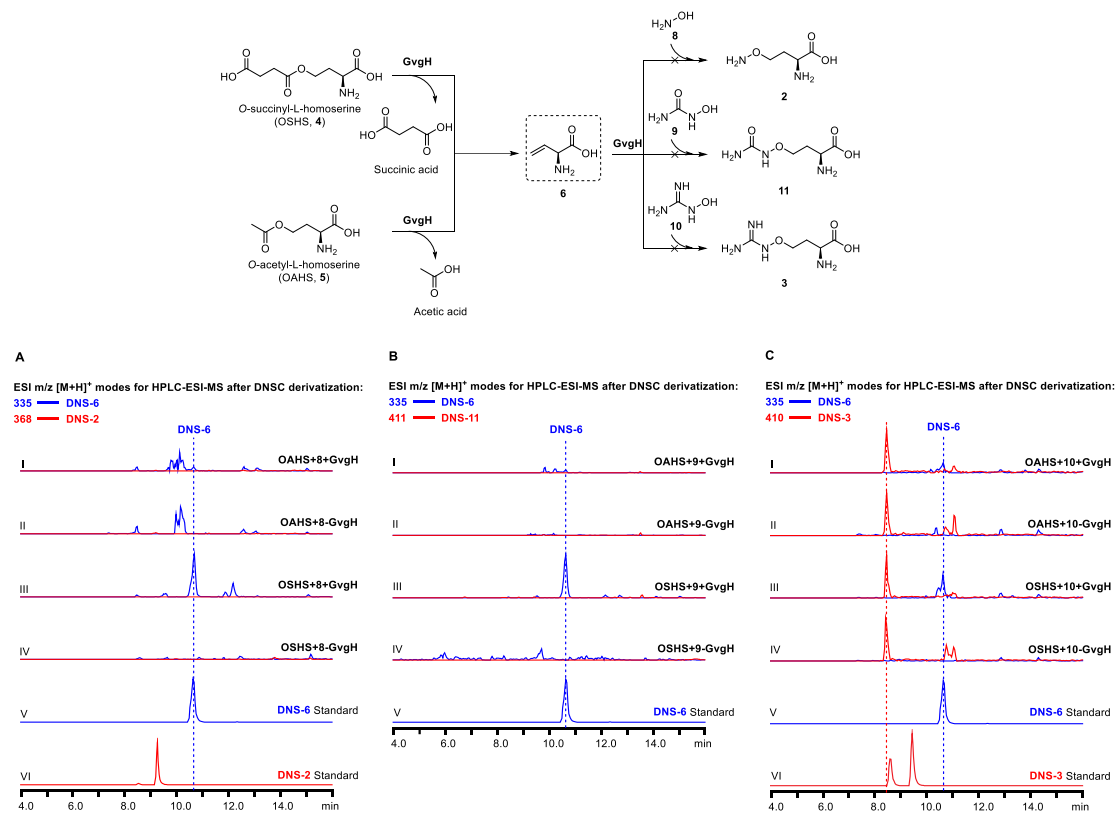

**Figure S18.** HPLC-ESI-HRMS analysis of PLP release from denatured GvgH, K268A and K268R by either boiling or adding 2% (v/v) formic acid.

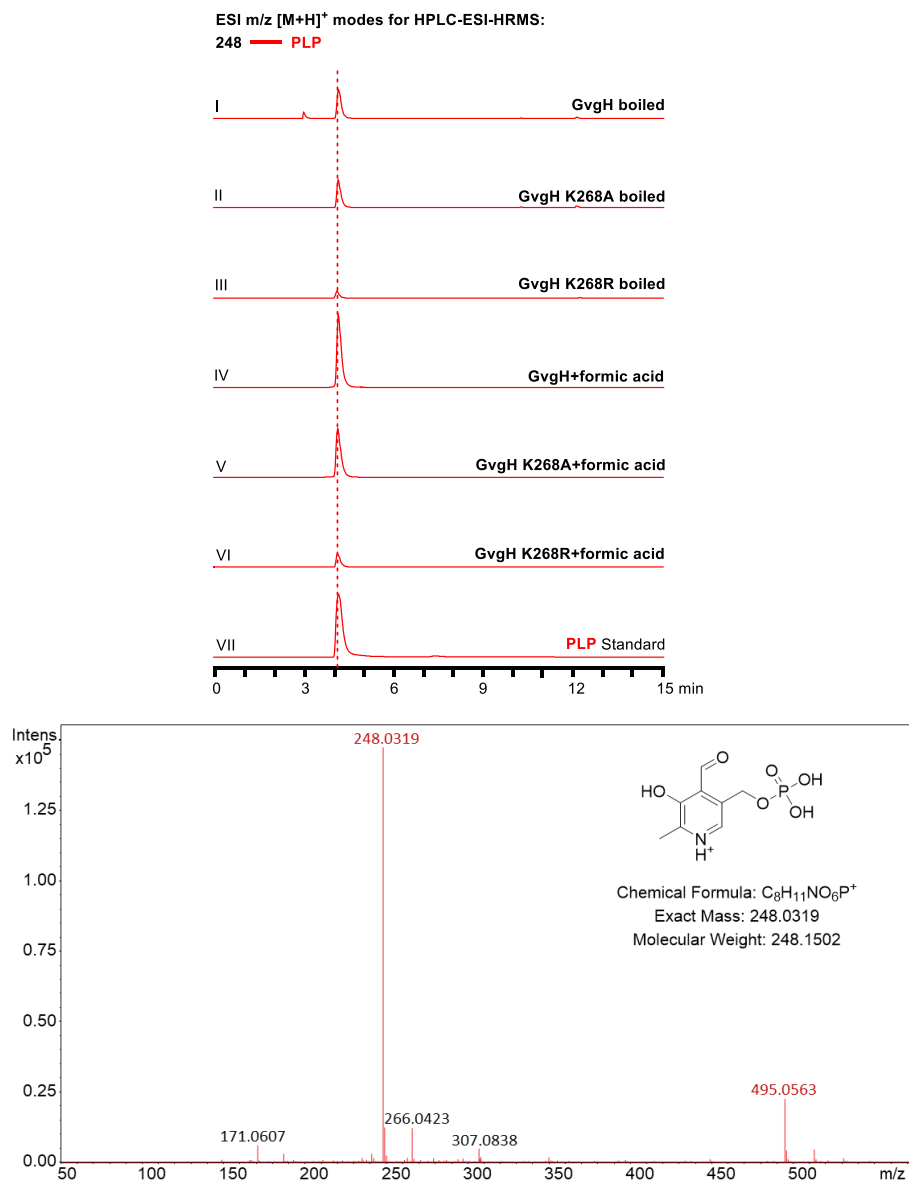

**Figure S19.** Evaluation of the putative catalytic K268 in GvgH.

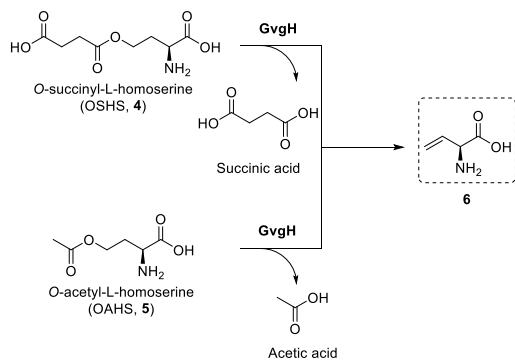

ESI  $m/z$   $[M+H]^+$  modes for HPLC-ESI-MS after DNSC derivatization:  
335 — DNS-6

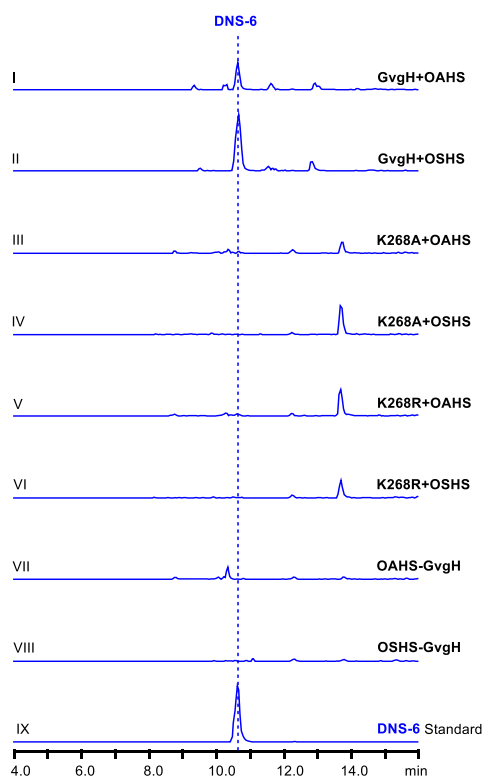

**Figure 20.** Reactions catalyzed by known biosynthetic enzymes belonging to HDO superfamily.<sup>16-</sup>

24

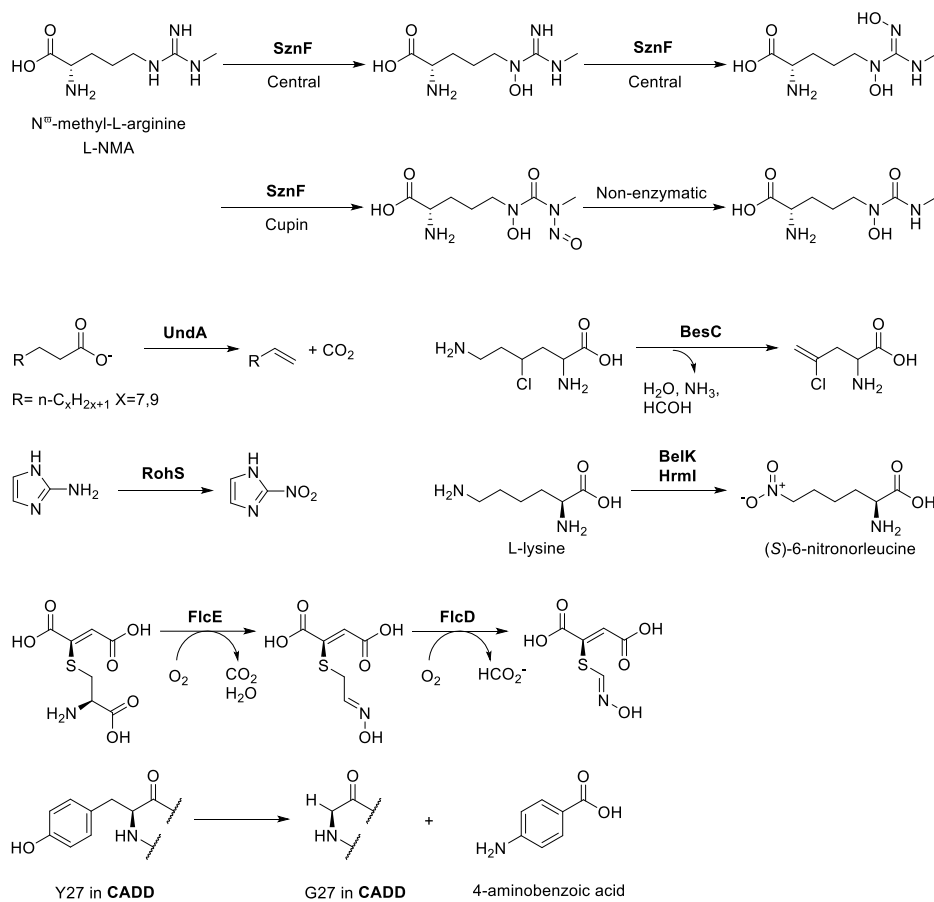



**Figure 21.** Plausible functions of GvgA, GvgC and GvgF.

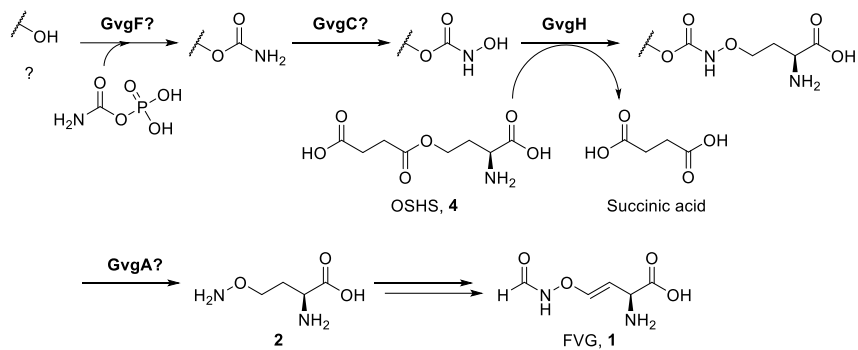

**Figure 22.** Chemical structures of crocagins, saxitoxin and the proposed functions of CgnI, SxtI and SxtL.<sup>25-28</sup>

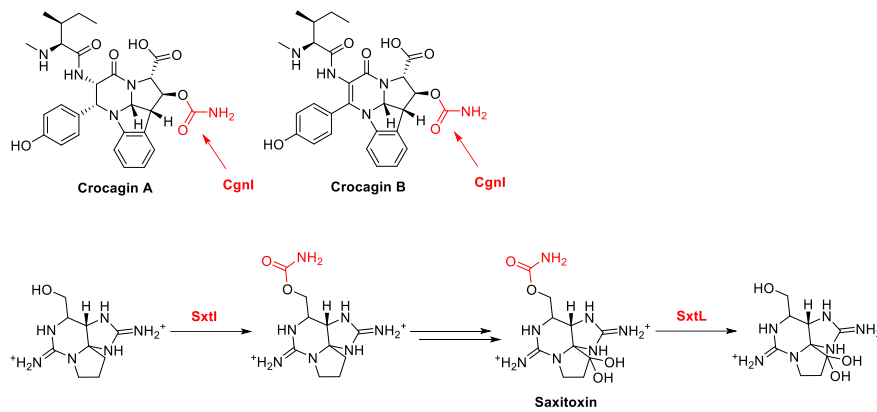

**Figure 23.** Other BGCs that including homologous genes of *gygACF*.

**A:**

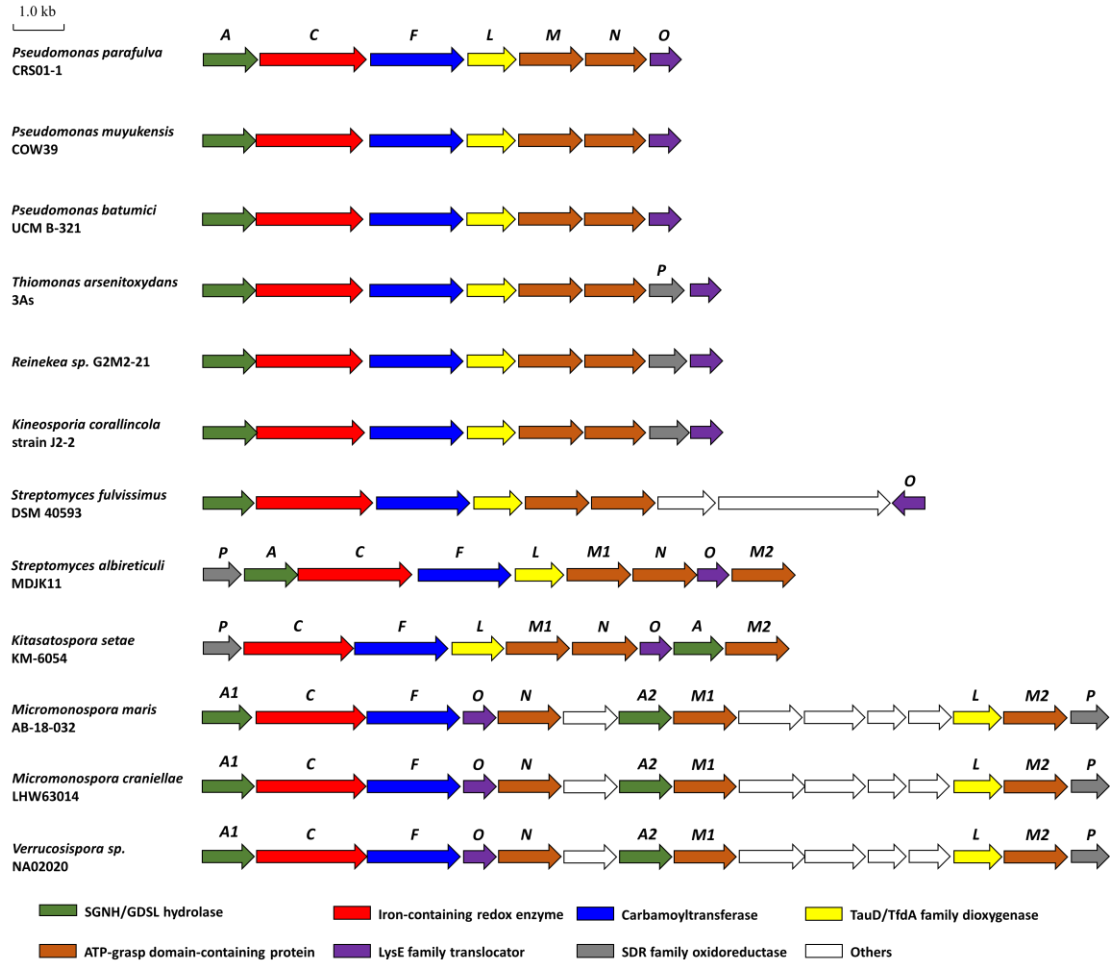

**B:**

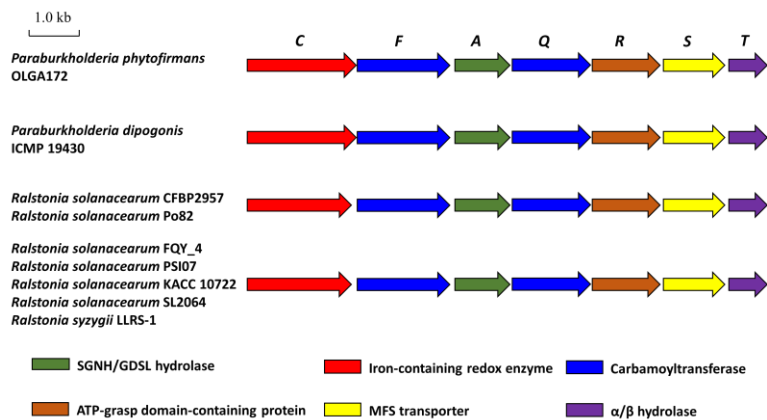

## Reference:

1. D. B. Berkowitz, B. D. Charette, K. R. Karukurichi and J. M. McFadden,  $\alpha$ -Vinyllic amino acids: occurrence, asymmetric synthesis, and biochemical mechanisms, *Tetrahedron: Asymmetry*, 2006, **17**, 869-882.
2. J. B. Patteson, Z. D. Dunn and B. Li, In vitro biosynthesis of the nonproteinogenic amino acid methoxyvinylglycine, *Angew. Chem. Int. Ed.*, 2018, **57**, 6780-6785.
3. J. B. Patteson, C. M. Fortinez, A. T. Putz, J. Rodriguez-Rivas, L. H. Bryant, K. Adhikari, M. Weigt, T. M. Schmeing and B. Li, Structure and function of a dehydrating condensation domain in nonribosomal peptide biosynthesis, *J. Am. Chem. Soc.*, 2022, **144**, 14057-14070.
4. T. Yasuta, S. Okazaki, H. Mitsui, K.-I. Yuhashi, H. Ezura and K. Minamisawa, DNA sequence and mutational analysis of rhizobitoxine biosynthesis genes in *Bradyrhizobium elkanii*, *Appl. Environ. Microbiol.*, 2001, **67**, 4999-5009.
5. S. Okazaki, M. Sugawara and K. Minamisawa, *Bradyrhizobium elkanii rtxC* gene is required for expression of symbiotic phenotypes in the final step of rhizobitoxine biosynthesis, *Appl. Environ. Microbiol.*, 2004, **70**, 535-541.
6. M. Sugawara, R. Haramaki, S. Nonaka, H. Ezura, S. Okazaki, S. Eda, H. Mitsui and K. Minamisawa, Rhizobitoxine production in *Agrobacterium tumefaciens* C58 by *Bradyrhizobium elkanii rtxACDEFG* genes, *FEMS Microbiol. Lett.*, 2007, **269**, 29-35.
7. T. Kumagai, Y. Koyama, K. Oda, M. Noda, Y. Matoba and M. Sugiyama, Molecular cloning and heterologous expression of a biosynthetic gene cluster for the antitubercular agent D-cycloserine produced by *Streptomyces lavendulae*, *Antimicrob. Agents Chemother.*, 2010, **54**, 1132-1139.
8. T. Kumagai, K. Takagi, Y. Koyama, Y. Matoba, K. Oda, M. Noda and M. Sugiyama, Heme protein and hydroxyarginase necessary for biosynthesis of D-cycloserine, *Antimicrob. Agents Chemother.*, 2012, **56**, 3682-3689.
9. D. Dietrich, M. J. van Belkum and J. C. Vederas, Characterization of DcsC, a PLP-independent racemase involved in the biosynthesis of D-cycloserine, *Org. Biomol. Chem.*, 2012, **10**, 2248-2254.
10. N. Uda, Y. Matoba, T. Kumagai, K. Oda, M. Noda and M. Sugiyama, Establishment of an *in vitro* D-cycloserine-synthesizing system by using *O*-ureido-L-serine synthase and D-

- cycloserine synthetase found in the biosynthetic pathway, *Antimicrob. Agents Chemother.*, 2013, **57**, 2603-2612.
11. Y. Matoba, N. Uda, M. Kudo and M. Sugiyama, Cyclization mechanism catalyzed by an ATP-grasp enzyme essential for D-cycloserine biosynthesis, *FEBS J.*, 2020, **287**, 2763-2778.
  12. A. Halgren, M. Maselko, M. Azevedo, D. Mills, D. Armstrong and G. Banowetz, Genetics of germination-arrest factor (GAF) production by *Pseudomonas fluorescens* WH6: identification of a gene cluster essential for GAF biosynthesis, *Microbiology*, 2013, **159**, 36-45.
  13. E. W. Davis, R. A. Okrent, V. A. Manning and K. M. Trippe, Unexpected distribution of the 4-formylaminoxyvinylglycine (FVG) biosynthetic pathway in *Pseudomonas* and beyond, *PLoS one*, 2021, **16**, e0247348.
  14. R. A. Okrent, K. M. Trippe, M. Maselko and V. Manning, Functional analysis of a biosynthetic cluster essential for production of 4-formylaminoxyvinylglycine, a germination-arrest factor from *Pseudomonas fluorescens* WH6, *Microbiology*, 2017, **163**, 207-217.
  15. A. L. Lukowski, L. Mallik, M. E. Hinze, B. M. Carlson, D. C. Ellinwood, J. B. Pyser, M. Koutmos and A. R. H. Narayan, Substrate promiscuity of a paralytic shellfish toxin amidinotransferase, *ACS Chem. Biol.*, 2020, **15**, 626-631.
  16. M. J. McBride, S. R. Pope, K. Hu, C. D. Okafor, E. P. Baskus, J. M. Bollinger and A. K. Boal, Structure and assembly of the diiron cofactor in the heme-oxygenase-like domain of the *N*-nitroso-urea-producing enzyme SznF, *Proc. Natl. Acad. Sci. U.S.A.*, 2021, **118**, e2015931118.
  17. Z. Rui, X. Li, X. Zhu, J. Liu, B. Domigan, I. Barr, J. H. D. Cate and W. Zhang, Microbial biosynthesis of medium-chain 1-alkenes by a nonheme iron oxidase, *Proc. Natl. Acad. Sci. U.S.A.*, 2014, **111**, 18237-18242.
  18. J. B. Hedges and K. S. Ryan, In vitro reconstitution of the biosynthetic pathway to the nitroimidazole antibiotic azomycin, *Angew. Chem. Int. Ed.*, 2019, **58**, 11647-11651.
  19. J. A. Marchand, M. E. Neugebauer, M. C. Ing, C. I. Lin, J. G. Pelton and M. C. Y. Chang, Discovery of a pathway for terminal-alkyne amino acid biosynthesis, *Nature*, 2019, **567**, 420-424.
  20. J. B. Patteson, A. T. Putz, L. Tao, W. C. Simke, L. H. Bryant, R. D. Britt and B. Li, Biosynthesis of fluopsin C, a copper-containing antibiotic from *Pseudomonas aeruginosa*, *Science*, 2021, **374**, 1005-1009.

21. S. Shimo, R. Ushimaru, A. Engelbrecht, M. Harada, K. Miyamoto, A. Kulik, M. Uchiyama, L. Kaysser and I. Abe, Stereodivergent nitrocyclopropane formation during biosynthesis of belactosins and hormaomycins, *J. Am. Chem. Soc.*, 2021, **143**, 18413-18418.
22. X. Li, R. Shimaya, T. Dairi, W.-c. Chang and Y. Ogasawara, Identification of cyclopropane formation in the biosyntheses of hormaomycins and belactosins: sequential nitration and cyclopropanation by metalloenzymes, *Angew. Chem. Int. Ed.*, 2022, **61**, e202113189.
23. L. Pang, W. Niu, Y. Duan, L. Huo, A. Li, J. Wu, Y. Zhang, X. Bian and G. Zhong, *In vitro* characterization of a nitro-forming oxygenase involved in 3-(*trans*-2'-aminocyclopropyl)alanine biosynthesis, *Engin. Microbiol.*, 2022, **2**, 100007.
24. O. M. Manley, H. N. Phan, A. K. Stewart, D. A. Mosley, S. Xue, L. Cha, H. Bai, V. C. Lightfoot, P. A. Rucker, L. Collins, T. I. Williams, W.-C. Chang, Y. Guo and T. M. Makris, Self-sacrificial tyrosine cleavage by an Fe:Mn oxygenase for the biosynthesis of *para*-aminobenzoate in *Chlamydia trachomatis*, *Proc. Natl. Acad. Sci. U.S.A.*, 2022, **119**, e2210908119.
25. K. Viehrig, F. Surup, C. Volz, J. Herrmann, A. Abou Fayad, S. Adam, J. Köhnke, D. Trauner and R. Müller, Structure and biosynthesis of crocagins: polycyclic posttranslationally modified ribosomal peptides from *Chondromyces crocatus*, *Angew. Chem. Int. Ed.*, 2017, **56**, 7407-7410.
26. S. Adam, D. Zheng, A. Klein, C. Volz, W. Mullen, S. L. Shirran, B. O. Smith, O. V. Kalinina, R. Müller and J. Koehnke, Unusual peptide-binding proteins guide pyrroloindoline alkaloid formation in crocagin biosynthesis, *Nat. Chem.*, 2023, **15**, 560-568.
27. R. Kellmann, T. K. Mihali, Y. J. Jeon, R. Pickford, F. Pomati and B. A. Neilan, Biosynthetic intermediate analysis and functional homology reveal a saxitoxin gene cluster in Cyanobacteria, *Appl. Environ. Microbiol.*, 2008, **74**, 4044-4053.
28. T. K. Mihali, R. Kellmann and B. A. Neilan, Characterisation of the paralytic shellfish toxin biosynthesis gene clusters in *Anabaena circinalis* AWQC131C and *Aphanizomenon sp.* NH-5, *BMC Biochem.*, 2009, **10**, 8.
